# Supplementary material
Source: Royal Society of Chemistry journal article supplement (doi:10.1039/d5fo04456a)
Supplement: d5fo04456a1.pdf [file d5fo04456a1.pdf]

1 **Acute response to a high-fat-high-refined carbohydrate meal in healthy young men shows**  
2 **novel perturbation of multiple metabolic and defense pathways**

3

4 Aimee L Dordevic <sup>1,2\*</sup> [aimee.dordevic@monash.edu](mailto:aimee.dordevic@monash.edu), ORCID 0000-0002-0405-3164

5 Margaret Murray <sup>1,3,4</sup> [msmurray@swin.edu.au](mailto:msmurray@swin.edu.au), ORCID 0000-0003-3767-6947

6 Michael J Houghton <sup>1,2</sup> [michael.houghton@monash.edu](mailto:michael.houghton@monash.edu), ORCID 0000-0001-6579-7995

7 Nina M Trinquet <sup>1,2</sup> [nina.trinquet1@monash.edu](mailto:nina.trinquet1@monash.edu), ORCID 0009-0009-2828-2963

8 Nicole J Kellow <sup>1,2</sup> [nicole.kellow@monash.edu](mailto:nicole.kellow@monash.edu), ORCID 0000-0002-4511-7259

9 Ralf B Schittenhelm <sup>5</sup> [ralf.schittenhelm@monash.edu](mailto:ralf.schittenhelm@monash.edu), ORCID 0000-0001-8738-1878

10 Christopher K Barlow <sup>5</sup> [chris.barlow@monash.edu](mailto:chris.barlow@monash.edu), ORCID 0000-0001-9309-2829

11 Kaitlin Day <sup>6</sup> [kaitlin.day@kcl.ac.uk](mailto:kaitlin.day@kcl.ac.uk), ORCID 0000-0003-3846-8568

12 Louise Bennett <sup>3</sup> [louise.bennett1@monash.edu](mailto:louise.bennett1@monash.edu), ORCID 0000-0001-9421-4410

13 Beau-Luke Colton <sup>1</sup> [beau.colton@gmail.com](mailto:beau.colton@gmail.com)

14 Gary Williamson <sup>1,2,7</sup> [g.williamson@qub.ac.uk](mailto:g.williamson@qub.ac.uk), ORCID 0000-0002-5624-6267

15

16

17

18 **Supplementary Tables.**

19 **Supplementary Table 1:** MPO products, common fatty acids and amino acids in plasma that changed during the experimental postprandial  
 20 period after consumption of the HFHCM.

|                              | Mass     | RT     |           | Isomers | Control time (min) |           |           | Experimental time (min) |                         |                         |
|------------------------------|----------|--------|-----------|---------|--------------------|-----------|-----------|-------------------------|-------------------------|-------------------------|
|                              |          | (min)  | Formula   |         | -120               | -60       | 0         | 60                      | 120                     | 360                     |
| L-Homocitrulline             | 189.1114 | 14.685 | C7H15N3O3 | 1       | 1388083            | 1337833   | 1298917   | 1308750                 | <b><u>1600333</u></b>   | <b><u>1708250</u></b>   |
| 3-(4-Hydroxyphenyl) pyruvate | 180.0423 | 8.034  | C9H8O4    | 11      | 224542             | 194367    | 191450    | <b><u>340242</u></b>    | <b><u>351467</u></b>    | <b><u>334175</u></b>    |
| L-Methionine S-oxide         | 165.0460 | 13.003 | C5H11NO3S | 4       | 580333             | 469167    | 528333    | <b><u>876667</u></b>    | <b><u>823333</u></b>    | <b><u>781833</u></b>    |
| C20:0                        | 312.3031 | 3.613  | C20H40O2  | 26      | 1154167            | 988333    | 1148667   | 939167                  | <b><u>697167</u></b>    | 1287083                 |
| C14:0                        | 228.2090 | 3.714  | C14H28O2  | 23      | 18493333           | 17970833  | 22104167  | <b><u>10755000</u></b>  | 13115000                | <b><u>61408333</u></b>  |
| C12:0                        | 200.1776 | 3.780  | C12H24O2  | 15      | 8759167            | 8488333   | 10331667  | 10100833                | <b><u>25909167</u></b>  | <b><u>180258333</u></b> |
| C10:0                        | 172.1463 | 3.909  | C10H20O2  | 24      | 3757500            | 3697500   | 4264167   | <b><u>11308333</u></b>  | <b><u>12740000</u></b>  | <b><u>70150000</u></b>  |
| C8:0                         | 144.1150 | 4.163  | C8H16O2   | 26      | 2616667            | 2623333   | 2691667   | <b><u>24666667</u></b>  | <b><u>18012500</u></b>  | <b><u>64375000</u></b>  |
| C20:1                        | 310.2874 | 3.611  | C20H38O2  | 29      | 2196750            | 1927833   | 2399167   | <b><u>1166417</u></b>   | <b><u>797417</u></b>    | <b><u>1252583</u></b>   |
| C18:3                        | 278.2248 | 3.665  | C18H30O2  | 58      | 12773333           | 13515000  | 17387500  | <b><u>6758333</u></b>   | <b><u>4329167</u></b>   | <b><u>8830833</u></b>   |
| C18:2                        | 280.2405 | 3.654  | C18H32O2  | 111     | 100600000          | 103308333 | 130450000 | <b><u>53733333</u></b>  | <b><u>34358333</u></b>  | <b><u>65875000</u></b>  |
| C18:1                        | 282.2560 | 3.642  | C18H34O2  | 57      | 248908333          | 237683333 | 297400000 | <b><u>122666667</u></b> | <b><u>76616667</u></b>  | <b><u>161566667</u></b> |
| C16:1                        | 254.2248 | 3.680  | C16H30O2  | 52      | 32481667           | 34606667  | 41790833  | <b><u>16010000</u></b>  | <b><u>8975833</u></b>   | <b><u>19083333</u></b>  |
| C16:0                        | 256.2404 | 3.664  | C16H32O2  | 27      | 180983333          | 175141667 | 213633333 | <b><u>101750000</u></b> | <b><u>75183333</u></b>  | 161583333               |
| C18:0                        | 284.2715 | 3.630  | C18H36O2  | 26      | 50675000           | 46116667  | 56183333  | <b><u>32991667</u></b>  | <b><u>25725000</u></b>  | 53533333                |
| L-Alanine                    | 89.0477  | 14.448 | C3H7NO2   | 9       | 71900000           | 73308333  | 70083333  | <b><u>84175000</u></b>  | <b><u>89983333</u></b>  | 77458333                |
| L-Proline                    | 115.0634 | 12.337 | C5H9NO2   | 3       | 542166667          | 544500000 | 536500000 | <b><u>713833333</u></b> | <b><u>748166667</u></b> | <b><u>774500000</u></b> |
| L-Valine                     | 117.0790 | 12.073 | C5H11NO2  | 17      | 91966667           | 89525000  | 87000000  | <b><u>116158333</u></b> | <b><u>114466667</u></b> | <b><u>124341667</u></b> |
| L-Threonine                  | 119.0583 | 14.214 | C4H9NO3   | 10      | 57383333           | 59766667  | 58925000  | <b><u>67175000</u></b>  | <b><u>66075000</u></b>  | 61816667                |
| L-Isoleucine                 | 131.0946 | 10.753 | C6H13NO2  | 12      | 7851667            | 7532500   | 7685833   | <b><u>12035000</u></b>  | <b><u>10815000</u></b>  | <b><u>12444167</u></b>  |
| L-Leucine                    | 131.0946 | 10.268 | C6H13NO2  | 12      | 60633333           | 61725000  | 63283333  | <b><u>93658333</u></b>  | <b><u>86425000</u></b>  | <b><u>102300000</u></b> |
| L-Asparagine                 | 132.0536 | 15.044 | C4H8N2O3  | 6       | 9615000            | 10875833  | 10777500  | 12412500                | 12722500                | 12117500                |
| L-Aspartate                  | 133.0375 | 14.802 | C4H7NO4   | 4       | 4695833            | 6041667   | 4947500   | 5485833                 | 6224583                 | 5245833                 |
| L-Glutamine                  | 146.0692 | 14.725 | C5H10N2O3 | 6       | 699083333          | 746250000 | 749083333 | 736250000               | 747833333               | 773416667               |

|                 |          |        |            |    |           |           |           |                        |                        |                        |
|-----------------|----------|--------|------------|----|-----------|-----------|-----------|------------------------|------------------------|------------------------|
| L-Lysine        | 146.1056 | 22.466 | C6H14N2O2  | 8  | 37066667  | 37050000  | 37500000  | <b><u>5000000</u></b>  | <b><u>47225000</u></b> | 44841667               |
| L-Glutamate     | 147.0531 | 14.486 | C5H9NO4    | 13 | 48000000  | 43191667  | 44333333  | 57841667               | 50500000               | 58766667               |
| L-Methionine    | 149.0511 | 11.095 | C5H11NO2S  | 5  | 14025000  | 14662500  | 14643333  | <b><u>19895000</u></b> | <b><u>19791667</u></b> | <b><u>18316667</u></b> |
| L-Histidine     | 155.0695 | 14.189 | C6H9N3O2   | 5  | 172516667 | 177591667 | 174633333 | 199883333              | 180925000              | 180408333              |
| L-Phenylalanine | 165.0789 | 9.633  | C9H11NO2   | 7  | 38625000  | 39341667  | 39258333  | <b><u>46750000</u></b> | <b><u>46741667</u></b> | <b><u>44950000</u></b> |
| L-Arginine      | 174.1117 | 23.888 | C6H14N4O2  | 2  | 35041667  | 33891667  | 35575000  | 41191667               | 38566667               | 34900000               |
| L-Tyrosine      | 181.0740 | 12.711 | C9H11NO3   | 11 | 20910833  | 19777500  | 19114167  | <b><u>26086667</u></b> | <b><u>25225000</u></b> | <b><u>27333333</u></b> |
| L-Tryptophan    | 204.0899 | 11.207 | C11H12N2O2 | 6  | 6745000   | 6737500   | 6395000   | 7125833                | 6657500                | 6149167                |
| L-Serine        | 105.0427 | 15.571 | C3H7NO3    | 4  | 5267273   | 5594167   | 5453333   | 6034167                | 6032500                | 5555000                |

21

22 Values are peak intensities. Bold and underlined values indicate a significant change ( $p < 0.01$ ). Isomers: The number of possible isomeric  
23 forms. Mass, exact mass; RT, retention time. Fatty acids shown using Cx:y notation where x is the carbon chain length and y is the number of  
24 double bonds.

25 **Supplementary Table 2.** Other fatty acids, glycine conjugates, bile acid products and cholates in plasma that changed during the experimental  
 26 postprandial period after consumption of the HFHCM.

|                | Mass     | RT    |          |         | Control time (min) |         |         | Experimental time (min) |                       |                       |
|----------------|----------|-------|----------|---------|--------------------|---------|---------|-------------------------|-----------------------|-----------------------|
|                |          | (min) | Formula  | Isomers | -120               | -60     | 0       | 60                      | 120                   | 360                   |
| C11:0          | 186.1619 | 3.847 | C11H22O2 | 26      | 513667             | 506167  | 539750  | 484667                  | 486667                | <b><u>912333</u></b>  |
| C17:0          | 270.2561 | 3.649 | C17H34O2 | 31      | 4352500            | 4018333 | 4940833 | <b><u>2619833</u></b>   | <b><u>2157333</u></b> | 5298333               |
| C24:0          | 366.3499 | 3.523 | C24H46O2 | 6       | 382167             | 350333  | 379833  | <b><u>269750</u></b>    | <b><u>232000</u></b>  | <b><u>286833</u></b>  |
| C8:1           | 142.0994 | 4.421 | C8H14O2  | 35      | 655250             | 689500  | 715917  | <b><u>567917</u></b>    | <b><u>555750</u></b>  | <b><u>567917</u></b>  |
| C14:1          | 226.1933 | 3.727 | C14H26O2 | 37      | 4188917            | 4733333 | 6062500 | <b><u>2533583</u></b>   | <b><u>1931083</u></b> | 4954167               |
| C19:1          | 296.2718 | 3.631 | C19H36O2 | 29      | 829250             | 765500  | 1018917 | <b><u>551083</u></b>    | <b><u>382000</u></b>  | 858333                |
| C10:2          | 168.1150 | 4.055 | C10H16O2 | 71      | 613500             | 610083  | 634083  | <b><u>510667</u></b>    | <b><u>447417</u></b>  | <b><u>476750</u></b>  |
| C18:4          | 276.2090 | 3.668 | C18H28O2 | 60      | 324667             | 397083  | 570250  | <b><u>355192</u></b>    | <b><u>304050</u></b>  | 343417                |
| C22:4          | 332.2717 | 3.615 | C22H36O2 | 10      | 751000             | 753500  | 928833  | <b><u>523750</u></b>    | <b><u>417250</u></b>  | <b><u>548667</u></b>  |
| C22:5          | 330.2560 | 3.620 | C22H34O2 | 15      | 1953333            | 2034750 | 2955833 | <b><u>1738917</u></b>   | <b><u>1259667</u></b> | <b><u>1737500</u></b> |
| hydroxy(C11:0) | 202.1569 | 3.919 | C11H22O3 | 6       | 207617             | 239967  | 270358  | 220400                  | <b><u>176817</u></b>  | 319667                |
| hydroxy(C16:0) | 272.2353 | 3.641 | C16H32O3 | 21      | 2768333            | 2940833 | 3006667 | 2670833                 | <b><u>2332500</u></b> | 3074167               |
| hydroxy(C18:1) | 314.2455 | 3.489 | C18H34O4 | 42      | 886833             | 924333  | 927250  | 826833                  | 859167                | <b><u>758667</u></b>  |
| hydroxy(C18:2) | 312.2304 | 4.077 | C18H32O4 | 68      | 1635500            | 1517083 | 1439500 | 1530917                 | 1489500               | <b><u>2366333</u></b> |
| hydroxy(C20:3) | 355.2722 | 7.249 | C20H34O4 | 13      | 617142             | 727167  | 695000  | 674167                  | 575442                | <b><u>492950</u></b>  |
| oxo(C10:0)     | 186.1255 | 3.953 | C10H18O3 | 19      | 670750             | 578667  | 589250  | 506083                  | <b><u>419500</u></b>  | 618000                |
| oxo(C14:0)     | 242.1884 | 3.687 | C14H26O3 | 9       | 1478917            | 1529500 | 1746750 | <b><u>1241333</u></b>   | <b><u>1149083</u></b> | 1316750               |
| oxo(C14:2)     | 240.1727 | 3.721 | C14H24O3 | 5       | 861083             | 921167  | 993917  | <b><u>738583</u></b>    | <b><u>643667</u></b>  | 767500                |
| methyl(C12:0)  | 214.1933 | 3.747 | C13H26O2 | 26      | 779250             | 720167  | 821000  | <b><u>614750</u></b>    | <b><u>591167</u></b>  | <b><u>1142000</u></b> |
| methyl(C14:0)  | 242.2247 | 3.689 | C15H30O2 | 22      | 3792500            | 3394167 | 4026667 | <b><u>2183833</u></b>   | <b><u>2028833</u></b> | 5510000               |
| methyl(C15:0)  | 258.1833 | 4.572 | C14H26O4 | 7       | 1108167            | 974333  | 953250  | 1036167                 | 1054750               | <b><u>2199333</u></b> |
| methyl(C16:0)  | 272.1990 | 4.504 | C15H28O4 | 3       | 98225              | 86925   | 90183   | 89942                   | 89167                 | <b><u>129517</u></b>  |
| methyl(C18:0)  | 298.2874 | 3.622 | C19H38O2 | 27      | 395333             | 347833  | 418833  | 315058                  | <b><u>247725</u></b>  | 440750                |
| methyl(C8:1)   | 156.1150 | 7.229 | C9H16O2  | 30      | 397333             | 365417  | 340167  | 389417                  | 368500                | <b><u>491250</u></b>  |
| methyl(C16:1)  | 268.2405 | 3.660 | C17H32O2 | 44      | 2551250            | 2428083 | 2997000 | <b><u>1332083</u></b>   | <b><u>967083</u></b>  | 2495833               |

|                         |          |       |            |    |         |         |          |                       |                       |                       |
|-------------------------|----------|-------|------------|----|---------|---------|----------|-----------------------|-----------------------|-----------------------|
| methyl,oxo(C5:0)        | 130.0630 | 6.650 | C6H10O3    | 18 | 1528333 | 1359750 | 1454333  | <b><u>1885833</u></b> | 1629167               | <b><u>1799167</u></b> |
| methoxy,hydroxy(C18:2)  | 326.2460 | 3.965 | C19H34O4   | 4  | 138400  | 133792  | 126450   | 132083                | 130050                | <b><u>155183</u></b>  |
| Dodecanedioic acid      | 230.1519 | 4.584 | C12H22O4   | 2  | 312992  | 236433  | 241200   | <b><u>1079500</u></b> | <b><u>927000</u></b>  | <b><u>9152500</u></b> |
| Decanedioic acid        | 202.1206 | 9.604 | C10H18O4   | 3  | 19708   | 12325   | 14558    | <b><u>59967</u></b>   | 44433                 | <b><u>289025</u></b>  |
| Bilirubin               | 584.2633 | 3.714 | C33H36N4O6 | 4  | 8755000 | 9475250 | 11034167 | <b><u>7079583</u></b> | <b><u>6207500</u></b> | <b><u>5984333</u></b> |
| I-Urobilinogen          | 592.3259 | 4.352 | C33H44N4O6 | 1  | 741583  | 824167  | 854417   | 1066917               | 1292917               | <b><u>2600167</u></b> |
| L-Urobilin              | 594.3420 | 4.317 | C33H46N4O6 | 1  | 270667  | 335250  | 419250   | 381667                | 484833                | <b><u>1607667</u></b> |
| D-Urobilinogen          | 590.3108 | 7.260 | C33H42N4O6 | 2  | 532000  | 597150  | 540750   | 618583                | 692550                | <b><u>1365417</u></b> |
| I-Urobilin              | 590.3110 | 4.383 | C33H42N4O6 | 2  | 479517  | 475767  | 491333   | 567750                | 630425                | <b><u>953417</u></b>  |
| Chenodeoxyglycocholate  | 449.3146 | 7.245 | C26H43NO5  | 5  | 1795833 | 1378583 | 901250   | <b><u>5587000</u></b> | <b><u>7835833</u></b> | <b><u>5775833</u></b> |
| Glycodeoxycholate       | 449.3145 | 4.309 | C26H43NO5  | 5  | 1426167 | 1109917 | 789750   | <b><u>4511083</u></b> | <b><u>6515833</u></b> | <b><u>4779167</u></b> |
| Glycocholate            | 465.3089 | 4.565 | C26H43NO6  | 2  | 430917  | 346083  | 285433   | <b><u>982083</u></b>  | <b><u>1794000</u></b> | <b><u>1326167</u></b> |
| Taurodeoxycholate       | 499.2982 | 4.025 | C26H45NO6S | 4  | 111608  | 72925   | 47842    | <b><u>444550</u></b>  | <b><u>744750</u></b>  | <b><u>543500</u></b>  |
| Hydroxy-isocaproic acid | 132.0786 | 4.610 | C6H12O3    | 16 | 246833  | 254833  | 242583   | 250167                | 239500                | <b><u>285917</u></b>  |
| Phenacetyl glycine      | 193.0737 | 4.619 | C10H11NO3  | 10 | 30292   | 36400   | 20667    | <b><u>136100</u></b>  | <b><u>169167</u></b>  | <b><u>149525</u></b>  |
| Capryloyl glycine       | 201.1365 | 4.249 | C10H19NO3  | 2  | 178600  | 175542  | 161058   | <b><u>112608</u></b>  | <b><u>118808</u></b>  | <b><u>78533</u></b>   |
| Hippurate               | 179.0583 | 7.262 | C9H9NO3    | 6  | 7416667 | 7158333 | 6750833  | <b><u>7004167</u></b> | <b><u>7888333</u></b> | <b><u>4718333</u></b> |
| 2-Methylbutyryl glycine | 159.0896 | 7.273 | C7H13NO3   | 10 | 1595583 | 1681000 | 1767417  | 1638500               | 1610917               | <b><u>1411417</u></b> |

27

28 Values are peak intensities. Bold and underlined values indicate a significant change ( $p < 0.01$ ). Isomers: The number of possible isomeric  
29 forms. Mass, exact mass; RT, retention time. Fatty acids shown using Cx:y notation where x is the carbon chain length and y is the number of  
30 double bonds.

31 **Supplementary Table 3.** Carnitines in plasma that changed during the experimental postprandial period after consumption of the HFHCM.

| Carnitines                                       | Mass     | RT     |           |         | Control (time, min) |           |           | Experimental (time, min) |                         |                         |
|--------------------------------------------------|----------|--------|-----------|---------|---------------------|-----------|-----------|--------------------------|-------------------------|-------------------------|
|                                                  |          | (min)  | Formula   | Isomers | -120                | -60       | 0         | 60                       | 120                     | 360                     |
| Acetylcarnitine                                  | 203.1158 | 10.309 | C9H17NO4  | 1       | 264416667           | 254475000 | 295666667 | <b><u>240333333</u></b>  | <b><u>188083333</u></b> | <b><u>219166667</u></b> |
| Propanoylcarnitine                               | 217.1314 | 9.050  | C10H19NO4 | 1       | 179333333           | 17200000  | 15551667  | 19135833                 | <b><u>23750000</u></b>  | <b><u>23425000</u></b>  |
| Octenoylcarnitine                                | 285.1939 | 7.263  | C15H27NO4 | 1       | 224533333           | 21729167  | 21411667  | 19940833                 | 19055000                | <b><u>16437500</u></b>  |
| Hexanoylcarnitine                                | 259.1783 | 7.266  | C13H25NO4 | 2       | 6596667             | 6345833   | 6505833   | 5750000                  | <b><u>4508333</u></b>   | 8030000                 |
| Palmitoylcarnitine                               | 399.3345 | 4.177  | C23H45NO4 | 1       | 2587750             | 2625333   | 2787583   | 2573500                  | <b><u>2235750</u></b>   | <b><u>2042500</u></b>   |
| Oleoylcarnitine                                  | 425.3504 | 4.107  | C25H47NO4 | 3       | 2911000             | 2975833   | 3126667   | <b><u>2552750</u></b>    | <b><u>2046583</u></b>   | <b><u>1685750</u></b>   |
| <i>cis</i> -5-Tetradecenoylcarnitine             | 369.2877 | 4.325  | C21H39NO4 | 2       | 2935333             | 2894333   | 3449833   | <b><u>2366667</u></b>    | <b><u>1623500</u></b>   | <b><u>1198000</u></b>   |
| Linoelaidylcarnitine                             | 423.3345 | 4.133  | C25H45NO4 | 3       | 1510000             | 1485833   | 1567500   | 1299500                  | <b><u>1122000</u></b>   | <b><u>945583</u></b>    |
| <i>2-trans,4-cis</i> -Decadienoyl carnitine      | 311.2095 | 4.576  | C17H29NO4 | 1       | 1522917             | 1768000   | 1708667   | <b><u>1220917</u></b>    | <b><u>986833</u></b>    | <b><u>831833</u></b>    |
| Hexenoylcarnitine                                | 257.1627 | 7.272  | C13H23NO4 | 1       | 821917              | 768000    | 824417    | 727917                   | <b><u>572083</u></b>    | 818167                  |
| Hexanoylcarnitine                                | 259.1783 | 4.720  | C13H25NO4 | 2       | 576500              | 521417    | 553667    | 516750                   | <b><u>390917</u></b>    | 683500                  |
| Heptanoylcarnitine                               | 273.1939 | 7.265  | C14H27NO4 | 1       | 721667              | 769000    | 753083    | 650667                   | <b><u>548833</u></b>    | 651333                  |
| <i>trans</i> -2-Tetradecenoylcarnitine           | 369.2878 | 7.227  | C21H39NO4 | 2       | 1470833             | 1543333   | 1867667   | 1290417                  | <b><u>806333</u></b>    | <b><u>573917</u></b>    |
| Undecanoylcarnitine                              | 329.2564 | 4.517  | C18H35NO4 | 2       | 700167              | 730250    | 807750    | 668508                   | <b><u>547967</u></b>    | <b><u>542667</u></b>    |
| Hydroxy-lauroylcarnitine                         | 359.2671 | 7.262  | C19H37NO5 | 1       | 719000              | 833750    | 867167    | 698500                   | <b><u>451750</u></b>    | 496500                  |
| Dimethylnonanoylcarnitine                        | 329.2564 | 7.252  | C18H35NO4 | 2       | 685583              | 748250    | 808583    | 633833                   | 569417                  | <b><u>495083</u></b>    |
| <i>trans</i> -Hexadec-2-enoylcarnitine           | 397.3191 | 4.213  | C23H43NO4 | 2       | 802167              | 850917    | 975000    | <b><u>674167</u></b>     | <b><u>512250</u></b>    | <b><u>457750</u></b>    |
| 3-Hydroxy- <i>cis</i> -5-tetradecenoyl carnitine | 385.2827 | 4.556  | C21H39NO5 | 2       | 692833              | 762500    | 797833    | <b><u>571333</u></b>     | <b><u>469250</u></b>    | <b><u>374917</u></b>    |
| Tetradecadienecarnitine                          | 367.2722 | 7.238  | C21H37NO4 | 1       | 992250              | 1015917   | 1174750   | <b><u>682667</u></b>     | <b><u>507417</u></b>    | <b><u>372500</u></b>    |
| 6-Keto-decanoylcarnitine                         | 329.2201 | 4.584  | C17H31NO5 | 1       | 442000              | 502167    | 477167    | 384283                   | <b><u>338900</u></b>    | <b><u>356083</u></b>    |
| 2-Hydroxymyristoylcarnitine                      | 387.2984 | 4.550  | C21H41NO5 | 1       | 341167              | 369642    | 377425    | 358883                   | 324667                  | <b><u>246583</u></b>    |
| Heptanoylcarnitine,1                             | 273.1939 | 4.578  | C14H27NO4 | 1       | 236167              | 237250    | 242167    | 193667                   | <b><u>155733</u></b>    | 186617                  |

|                                       |          |        |           |   |        |        |        |                      |                      |                      |
|---------------------------------------|----------|--------|-----------|---|--------|--------|--------|----------------------|----------------------|----------------------|
| 3-Hydroxy-5, 8-tetradecadiencarnitine | 383.2671 | 4.568  | C21H37NO5 | 1 | 307417 | 348500 | 321000 | 222275               | <b><u>184742</u></b> | <b><u>167167</u></b> |
| 3-Hydroxyhexadecadienoylcarnitine     | 411.2986 | 4.447  | C23H41NO5 | 2 | 188167 | 202317 | 207925 | 181083               | 161483               | <b><u>118900</u></b> |
| Elaidiccarnitine                      | 425.3506 | 7.008  | C25H47NO4 | 3 | 171733 | 173867 | 188892 | <b><u>152167</u></b> | <b><u>118542</u></b> | <b><u>104817</u></b> |
| 9-Hexadecenoylcarnitine               | 397.3192 | 7.185  | C23H43NO4 | 2 | 172717 | 176017 | 180917 | 148683               | <b><u>101742</u></b> | <b><u>98117</u></b>  |
| 9,12-Hexadecadienoylcarnitine         | 395.3036 | 4.256  | C23H41NO4 | 1 | 256417 | 267167 | 325833 | 217750               | <b><u>65583</u></b>  | <b><u>19500</u></b>  |
| Hydroxybutyrylcarnitine,1             | 293.1478 | 9.118  | C11H21NO5 | 1 | 219500 | 235250 | 235417 | <b><u>376592</u></b> | <b><u>316167</u></b> | <b><u>330500</u></b> |
| Hydroxypropionylcarnitine             | 279.1320 | 10.504 | C10H19NO5 | 1 | 142800 | 149875 | 155025 | <b><u>207442</u></b> | 183333               | 186417               |

32

33 Values are peak intensities. Bold and underlined values indicate a significant change ( $p < 0.01$ ). Isomers: The number of possible isomeric  
34 forms. Mass, exact mass; RT, retention time.

35 **Supplementary Table 4:** Phospholipids in plasma that changed during the experimental postprandial period after consumption of the HFHCM.

| tentative ID | Mass     | RT<br>(min) | FORMULA    | Isomers | Control time (min) |           |           | Experimental time (min) |                         |                        |
|--------------|----------|-------------|------------|---------|--------------------|-----------|-----------|-------------------------|-------------------------|------------------------|
|              |          |             |            |         | -120               | -60       | 0         | 60                      | 120                     | 360                    |
| PE(32:1)     | 731.5466 | 4.142       | C40H78NO8P | 42      | 2192500            | 2351667   | 2230000   | 2277500                 | 2395000                 | <b><u>2812500</u></b>  |
| PC(34:2)     | 757.5619 | 3.680       | C42H80NO8P | 56      | 329666667          | 324583333 | 326166667 | <b><u>296750000</u></b> | <b><u>298833333</u></b> | 331416667              |
| PC(36:2)     | 785.5925 | 3.652       | C44H84NO8P | 80      | 173333333          | 170166667 | 171000000 | <b><u>153166667</u></b> | <b><u>154250000</u></b> | 177250000              |
| PC(34:1)     | 759.5757 | 3.677       | C42H82NO8P | 48      | 159916667          | 160000000 | 162916667 | <b><u>150833333</u></b> | <b><u>150583333</u></b> | 160333333              |
| PE(34:2)     | 757.5621 | 4.996       | C42H80NO8P | 56      | 3046667            | 3074167   | 3109167   | 3073333                 | 3228333                 | <b><u>3964167</u></b>  |
| PC(36:4)     | 781.5616 | 3.661       | C44H80NO8P | 62      | 119441667          | 117925000 | 120716667 | <b><u>108975000</u></b> | <b><u>108383333</u></b> | 115383333              |
| PC(36:3)     | 783.5765 | 3.655       | C44H82NO8P | 45      | 96000000           | 96150000  | 96166667  | <b><u>87766667</u></b>  | <b><u>86808333</u></b>  | 95766667               |
| PC(38:4)     | 809.5923 | 3.625       | C46H84NO8P | 38      | 63916667           | 65283333  | 66708333  | <b><u>61266667</u></b>  | <b><u>61033333</u></b>  | 63875000               |
| PC(38:6)     | 805.5615 | 3.635       | C46H80NO8P | 46      | 60666667           | 60375000  | 64050000  | <b><u>58041667</u></b>  | <b><u>57525000</u></b>  | 59725000               |
| PC(32:1)     | 731.5464 | 3.715       | C40H78NO8P | 42      | 9273333            | 9245000   | 9382500   | 9050833                 | 9255000                 | <b><u>10842500</u></b> |
| PC(38:2)     | 835.6066 | 3.612       | C46H88NO8P | 36      | 8850833            | 9239167   | 9410833   | 8633333                 | <b><u>8493333</u></b>   | 8668333                |
| PC(38:3)     | 795.6120 | 3.623       | C46H86NO7P | 27      | 6858333            | 6866667   | 7025833   | 6400833                 | <b><u>6143333</u></b>   | <b><u>6085833</u></b>  |
| PC(34:1)     | 743.5822 | 3.670       | C42H82NO7P | 28      | 6365833            | 6500833   | 6663333   | <b><u>5975000</u></b>   | <b><u>5790833</u></b>   | <b><u>5545833</u></b>  |
| PC(36:2)     | 769.5965 | 3.648       | C44H84NO7P | 28      | 5470833            | 5729167   | 5575833   | 5045000                 | <b><u>4876667</u></b>   | 4851667                |
| PC(30:0)     | 705.5308 | 3.738       | C38H76NO8P | 36      | 2215833            | 2174167   | 2108333   | 1964167                 | 1986667                 | <b><u>4468333</u></b>  |
| PC(32:2)     | 729.5312 | 3.733       | C40H76NO8P | 34      | 3135833            | 3175000   | 3310000   | 2945000                 | 3072500                 | <b><u>4219167</u></b>  |
| PC(40:5)     | 819.6130 | 3.616       | C48H86NO7P | 14      | 2889167            | 2959167   | 3010833   | 2794167                 | 2715833                 | <b><u>2605833</u></b>  |
| PC(28:0)     | 677.4993 | 3.781       | C36H72NO8P | 34      | 253333             | 240000    | 254500    | 296833                  | 495417                  | <b><u>2591667</u></b>  |
| PC(36:1)     | 771.6124 | 3.646       | C44H86NO7P | 24      | 2216667            | 2397500   | 2427500   | 2136667                 | <b><u>2082500</u></b>   | 2090000                |
| PC(40:4)     | 821.6280 | 3.610       | C48H88NO7P | 12      | 2330000            | 2300000   | 2441667   | 2214167                 | 2175833                 | <b><u>2054167</u></b>  |
| PC(32:0)     | 717.5654 | 3.703       | C40H80NO7P | 18      | 1575833            | 1613333   | 1716333   | <b><u>1491083</u></b>   | <b><u>1503667</u></b>   | <b><u>1451667</u></b>  |
| PE(38:2)     | 771.5774 | 3.661       | C43H82NO8P | 43      | 8095833            | 7875833   | 8262500   | <b><u>7431667</u></b>   | <b><u>7431667</u></b>   | 8473333                |
| PE(35:1)     | 731.5466 | 4.142       | C40H78NO8P | 42      | 2192500            | 2351667   | 2230000   | 2277500                 | 2395000                 | <b><u>2812500</u></b>  |
| PE(38:5)     | 749.5357 | 3.550       | C43H76NO7P | 16      | 2020417            | 2167083   | 2165000   | 1987250                 | <b><u>1910000</u></b>   | <b><u>1796917</u></b>  |

|              |          |       |            |    |         |         |         |                      |                       |                        |
|--------------|----------|-------|------------|----|---------|---------|---------|----------------------|-----------------------|------------------------|
| PI(34:1)     | 836.5422 | 3.473 | C43H81O13P | 21 | 820333  | 838667  | 799583  | 749417               | 781333                | <b><u>953000</u></b>   |
| PI(36:4)     | 858.5268 | 3.471 | C45H79O13P | 22 | 763500  | 726833  | 744333  | 723917               | 741917                | <b><u>909750</u></b>   |
| PI(34:2)     | 834.5268 | 3.479 | C43H79O13P | 21 | 629667  | 596917  | 575667  | 577000               | 616333                | <b><u>707417</u></b>   |
| LysoPC(14:0) | 467.3011 | 4.342 | C22H46NO7P | 5  | 7055000 | 6957500 | 6509167 | 6357500              | 7287500               | <b><u>10848333</u></b> |
| LysoPE(16:0) | 453.2860 | 4.250 | C21H44NO7P | 9  | 978667  | 951833  | 933417  | 988250               | <b><u>1097250</u></b> | <b><u>1159250</u></b>  |
| LysoPE(18:2) | 477.2857 | 7.241 | C23H44NO7P | 3  | 3742500 | 3460000 | 3280833 | 3735000              | <b><u>4165000</u></b> | <b><u>6330000</u></b>  |
| LysoPE(18:2) | 477.2856 | 4.209 | C23H44NO7P | 3  | 3355833 | 2953333 | 2926667 | 3290000              | 3683333               | <b><u>5429167</u></b>  |
| LysoPC(12:0) | 439.2699 | 4.477 | C20H42NO7P | 12 | 113658  | 114808  | 92367   | <b><u>354417</u></b> | <b><u>717833</u></b>  | <b><u>3109167</u></b>  |
| LysoPE(16:0) | 453.2855 | 7.250 | C21H44NO7P | 9  | 2033333 | 1984167 | 1979167 | 2152500              | 2217500               | <b><u>2649167</u></b>  |
| LysoPE(17:0) | 467.3012 | 7.249 | C22H46NO7P | 5  | 5570833 | 5535000 | 5109167 | 5310833              | 5562500               | <b><u>8934167</u></b>  |
| LysoPE(20:5) | 499.2702 | 4.178 | C25H42NO7P | 3  | 173058  | 157633  | 158750  | 190783               | <b><u>199567</u></b>  | <b><u>363667</u></b>   |
| LysoPE(20:5) | 499.2695 | 7.235 | C25H42NO7P | 3  | 171333  | 159850  | 153325  | 190950               | <b><u>211017</u></b>  | <b><u>328667</u></b>   |

36

37 Values are peak intensities. Only compounds which showed a significant change (values in bold and underlined;  $p < 0.01$ ) are included. Any  
38 phospholipids that changed during the control period are excluded. Tentative ID: Indicated phospholipids were automatically tentatively  
39 identified based on exact mass and retention time. Isomers: The number of possible isomeric forms. For each PC species there is an isomeric PE  
40 species and so in principal any of the PCs could be PEs or vice versa. We have annotated each compound as the lipid we estimate is most likely  
41 to be the most abundant based on known human metabolite data. For each of the PC and PE isomeric pairs, one will have an even number of  
42 carbons across the fatty chains and the other odd. We have assigned species with an even number of carbon atoms as there are significantly more  
43 fatty acids in vivo with this configuration. Mass, exact mass; RT, retention time; PC, phosphatidyl choline; PE, phosphatidyl ethanolamine; PI,  
44 phosphatidyl inositol. Fatty acids shown using Cx:y notation where x is the carbon chain length and y is the number of double bonds, but for the  
45 phospholipids indicated here, the numbers are a sum of the fatty acids present in the phospholipid.

46 **Supplementary Table 5.** Peptides in plasma that changed during the experimental postprandial period after consumption of the HFHCM.

47

48

| 49 | peptides                       | Mass     | RT     | Formula    | Isomers | Control time (min) |          |          | Experimental time (min) |                       |                        |
|----|--------------------------------|----------|--------|------------|---------|--------------------|----------|----------|-------------------------|-----------------------|------------------------|
|    |                                |          |        |            |         | -120               | -60      | 0        | 60                      | 120                   | 360                    |
| 50 | Ile-pro                        | 228.1474 | 9.330  | C11H20N2O3 | 3       | 13973333           | 14129167 | 13775833 | 12525000                | 12344167              | <b><u>10956667</u></b> |
|    | Leu-Pro                        | 228.1474 | 12.422 | C11H20N2O3 | 3       | 4734167            | 4930833  | 4720000  | 4465833                 | 4373333               | <b><u>3815000</u></b>  |
| 51 | Phe-Gly                        | 222.1004 | 10.901 | C11H14N2O3 | 1       | 2415667            | 2571083  | 2649417  | <b><u>3278333</u></b>   | <b><u>3150000</u></b> | <b><u>3276667</u></b>  |
| 52 | Ile-Ala                        | 202.1318 | 12.050 | C9H18N2O3  | 3       | 2000833            | 2096667  | 2060833  | 1864167                 | 1856667               | <b><u>1546667</u></b>  |
| 53 | $\gamma$ -Glu-ala              | 218.0903 | 14.105 | C8H14N2O5  | 3       | 1133250            | 1164500  | 1166500  | <b><u>1541167</u></b>   | <b><u>1550833</u></b> | 1300500                |
|    | Ile-Ala-Gly                    | 259.1533 | 15.145 | C11H21N3O4 | 5       | 363208             | 511417   | 502317   | 691500                  | <b><u>884250</u></b>  | 580900                 |
| 54 | Glu-lys                        | 275.1483 | 17.778 | C11H21N3O5 | 6       | 256750             | 231750   | 231000   | <b><u>340083</u></b>    | <b><u>322417</u></b>  | <b><u>340000</u></b>   |
| 55 | Ala-Ser                        | 176.0798 | 21.760 | C6H12N2O4  | 4       | 181167             | 190833   | 179583   | 221750                  | 212583                | <b><u>228333</u></b>   |
|    | Lys-Pro                        | 243.1583 | 10.021 | C11H21N3O3 | 1       | 143792             | 56192    | 60183    | 44233                   | 47367                 | <b><u>207583</u></b>   |
| 56 | Ile-Gly-Val                    | 287.1846 | 13.279 | C13H25N3O4 | 3       | 103733             | 127383   | 122208   | <b><u>185933</u></b>    | <b><u>204917</u></b>  | 167275                 |
| 57 | $\gamma$ -Glu-ile              | 260.1375 | 10.493 | C11H20N2O5 | 4       | 95200              | 93992    | 95075    | 119433                  | <b><u>125958</u></b>  | <b><u>145050</u></b>   |
|    | $\gamma$ -Glu- $\epsilon$ -lys | 275.1482 | 16.485 | C11H21N3O5 | 6       | 163092             | 177733   | 156342   | 242550                  | 198250                | <b><u>261875</u></b>   |
| 58 | Pro-hydroxypro                 | 228.1111 | 12.751 | C10H16N2O4 | 2       | 504667             | 464250   | 420583   | 375250                  | 327750                | <b><u>227667</u></b>   |

59

60 Values are peak intensities. Only compounds which showed a significant change (values in bold and underlined;  $p < 0.01$ ) are included. Any  
61 peptides that changed during the control period are excluded. Peptides were automatically tentatively identified based on exact mass and  
62 retention time. Isomers: The number of possible isomeric forms. Mass, exact mass; RT, retention time.

63 **Supplementary Table 6.** Miscellaneous metabolites in plasma that changed during the experimental postprandial period after consumption of  
 64 the HFHCM.

| Metabolite                                  | Mass     | RT     |            |         | Control time (min) |            |            | Experimental time (min) |                         |                         |
|---------------------------------------------|----------|--------|------------|---------|--------------------|------------|------------|-------------------------|-------------------------|-------------------------|
|                                             |          | (min)  | Formula    | Isomers | -120               | -60        | 0          | 60                      | 120                     | 360                     |
| Creatine                                    | 131.0694 | 14.238 | C4H9N3O2   | 2       | 629000000          | 601250000  | 560916667  | <b><u>720833333</u></b> | <b><u>702500000</u></b> | <b><u>680666667</u></b> |
| Sulfate                                     | 97.9673  | 18.185 | H2O4S      | 1       | 65941667           | 61125000   | 59125000   | 60791667                | 64100000                | <b><u>67666667</u></b>  |
| N1-Methyl-2-pyridone-5-carboxamide          | 152.0586 | 7.323  | C7H8N2O2   | 3       | 41000000           | 42116667   | 42716667   | 41091667                | 39266667                | <b><u>29908333</u></b>  |
| Formyl-N-acetyl-5-methoxykynurenamine       | 264.1109 | 4.647  | C13H16N2O4 | 4       | 4234917            | 4032333    | 3769583    | 3618250                 | 3704917                 | <b><u>2638083</u></b>   |
| Hypoxanthine                                | 136.0386 | 9.842  | C5H4N4O    | 3       | 7760000            | 5629167    | 5400833    | 4403333                 | 3781667                 | <b><u>2145000</u></b>   |
| Indolelactate                               | 205.0739 | 7.914  | C11H11NO3  | 5       | 1438500            | 1354583    | 1318917    | 1258000                 | 1289417                 | <b><u>1151750</u></b>   |
| N-acetyl-arginine                           | 216.1223 | 13.980 | C8H16N4O3  | 2       | 1456833            | 1419000    | 1421583    | 1239083                 | 1344000                 | <b><u>1110750</u></b>   |
| Caffeine                                    | 194.0805 | 4.594  | C8H10N4O2  | 1       | 1466292            | 1371842    | 1172167    | 1187250                 | 1123342                 | <b><u>932567</u></b>    |
| 5-6-Dihydrouridine                          | 246.0851 | 10.147 | C9H14N2O6  | 2       | 991417             | 1017667    | 1033083    | 915500                  | 917750                  | <b><u>892000</u></b>    |
| Indole                                      | 117.0579 | 9.625  | C8H7N      | 2       | 629167             | 651500     | 634333     | 748417                  | <b><u>765500</u></b>    | <b><u>745000</u></b>    |
| 4-Acetamidobutanoate                        | 145.0739 | 8.888  | C6H11NO3   | 9       | 687167             | 683083     | 652917     | 580750                  | 587583                  | <b><u>563500</u></b>    |
| D-Glucuronate                               | 194.0426 | 16.339 | C6H10O7    | 15      | 380083             | 386750     | 378000     | 375500                  | 393000                  | <b><u>452417</u></b>    |
| Glycerol                                    | 92.0472  | 10.141 | C3H8O3     | 1       | 462167             | 482000     | 500917     | 371917                  | <b><u>359583</u></b>    | 447500                  |
| N-Acetyl-D-glucosaminat                     | 237.0849 | 14.085 | C8H15NO7   | 4       | 446833             | 506000     | 535417     | 477500                  | 483500                  | <b><u>390917</u></b>    |
| 3-(4-Hydroxyphenyl)pyruvate                 | 180.0423 | 8.034  | C9H8O4     | 11      | 224542             | 194367     | 191450     | <b><u>340242</u></b>    | <b><u>351467</u></b>    | <b><u>334175</u></b>    |
| N4-Acetylcytidine                           | 285.0960 | 7.847  | C11H15N3O6 | 1       | 173500             | 169417     | 160583     | 151033                  | 150333                  | <b><u>135317</u></b>    |
| Nicotinamide-N-oxide                        | 138.0429 | 8.897  | C6H6N2O2   | 3       | 157975             | 159250     | 157508     | 140083                  | 130267                  | <b><u>109742</u></b>    |
| N-Carboxyethyl- $\gamma$ -aminobutyric acid | 175.0845 | 12.131 | C7H13NO4   | 3       | 212867             | 227583     | 192017     | 191083                  | 221083                  | <b><u>96008</u></b>     |
| Indoxylsulfate                              | 213.0097 | 8.043  | C8H7NO4S   | 1       | 7416667            | 7158333    | 6750833    | 7004167                 | 7888333                 | <b><u>4718333</u></b>   |
| Pyruvate                                    | 88.0160  | 7.325  | C3H4O3     | 3       | 4594000            | 4083667    | 3663333    | 5496917                 | <b><u>5899333</u></b>   | 4286333                 |
| Cholesterol sulfate                         | 466.3119 | 3.447  | C27H46O4S  | 1       | 3740833            | 3611667    | 3558333    | 3509167                 | 3655000                 | <b><u>4201667</u></b>   |
| $\alpha$ -N-Phenylacetyl-L-glutamine        | 264.1109 | 7.266  | C13H16N2O4 | 4       | 40690000           | 38895833   | 35803333   | 35060000                | 34099167                | <b><u>23049167</u></b>  |
| Carnitine <sup>1</sup>                      | 161.1052 | 12.698 | C7H15NO3   | 2       | 1275333333         | 1312666667 | 1271083333 | 1290416667              | 1387916667              | 1307833333              |
| Urate <sup>1</sup>                          | 168.0283 | 12.619 | C5H4N4O3   | 1       | 52866667           | 52741667   | 51400000   | 51333333                | 52016667                | 48383333                |
| Cholate <sup>1</sup>                        | 425.3140 | 4.352  | C24H40O5   | 82      | 966333             | 570000     | 422383     | 479250                  | 421167                  | 346417                  |

|                                                                 |          |        |                                                               |   |          |          |          |          |                       |                        |
|-----------------------------------------------------------------|----------|--------|---------------------------------------------------------------|---|----------|----------|----------|----------|-----------------------|------------------------|
| Indole                                                          | 117.0579 | 9.625  | C <sub>8</sub> H <sub>7</sub> N                               | 2 | 629167   | 651500   | 634333   | 748417   | <b><u>765500</u></b>  | <b><u>745000</u></b>   |
| Proline betaine                                                 | 143.0947 | 10.144 | C <sub>7</sub> H <sub>13</sub> NO <sub>2</sub>                | 2 | 97805000 | 95210000 | 91670833 | 87740833 | 86049167              | <b><u>74355000</u></b> |
| 1-/3-methyl histidine                                           | 169.0852 | 12.523 | C <sub>7</sub> H <sub>11</sub> N <sub>3</sub> O <sub>2</sub>  | 5 | 90825000 | 86066667 | 81425000 | 78876667 | 73716667              | <b><u>56916667</u></b> |
| (S)-ATPA (3-(5-tert-butyl-3-hydroxy-1,2-oxazol-4-yl)-L-alanine) | 228.1110 | 14.520 | C <sub>10</sub> H <sub>16</sub> N <sub>2</sub> O <sub>4</sub> | 2 | 2916667  | 2816667  | 2483333  | 2058417  | <b><u>1654167</u></b> | <b><u>1063417</u></b>  |
| 2-oxosuberate (2-Oxooctanedionic acid)                          | 210.0505 | 13.159 | C <sub>8</sub> H <sub>12</sub> O <sub>5</sub>                 | 1 | 180833   | 193750   | 187250   | 165833   | <b><u>155000</u></b>  | <b><u>131883</u></b>   |
| THTC (2-tetrahydrothiophenecarboxylic acid)                     | 178.0300 | 7.612  | C <sub>5</sub> H <sub>8</sub> O <sub>2</sub> S                | 1 | 373417   | 378417   | 345750   | 360333   | 387167                | <b><u>402500</u></b>   |
| Muramic acid                                                    | 251.1006 | 12.909 | C <sub>9</sub> H <sub>17</sub> NO <sub>7</sub>                | 1 | 706333   | 760500   | 762917   | 999917   | <b><u>1000417</u></b> | 740583                 |

65

66 Values are peak intensities. Only compounds which showed a significant change (values in bold and underlined;  $p < 0.01$ ) are included. The  
67 number of possible isomeric forms. Mass, exact mass; RT, retention time. <sup>1</sup> Did not change at any time point but shown for reference.

68 **Supplementary Table 7.** Unknown or tentative compounds in plasma that changed during the experimental postprandial period after  
 69 consumption of the HFHCM.

| Mass     | Control time (min) |          |          | Experimental time (min) |                 |                 | Speculative identification     |
|----------|--------------------|----------|----------|-------------------------|-----------------|-----------------|--------------------------------|
|          | -120               | -60      | 0        | 60                      | 120             | 360             |                                |
| 84.0213  | 428333             | 425750   | 504333   | 409417                  | <u>320250</u>   | <u>347500</u>   | 3-Butynoate                    |
| 85.0892  | 2999167            | 2889167  | 2977500  | <u>4491667</u>          | <u>4042500</u>  | <u>4678333</u>  |                                |
| 99.0684  | 27010833           | 28961667 | 30665833 | 32117500                | 33705000        | <u>16603333</u> |                                |
| 103.0633 | 21108333           | 20950000 | 20425000 | 23068333                | <u>24066667</u> | <u>23125000</u> |                                |
| 103.0634 | 2875000            | 2855000  | 2803333  | 2773333                 | 2565833         | <u>2457500</u>  | (R)-3-Amino-2-methylpropanoate |
| 112.0273 | 110408             | 117908   | 119958   | 92175                   | <u>72767</u>    | <u>64467</u>    |                                |
| 113.0477 | 559917             | 557750   | 480917   | <u>706833</u>           | <u>668500</u>   | 554750          |                                |
| 115.0269 | 1388083            | 1215833  | 1115417  | 1579358                 | <u>1624833</u>  | 1254250         | Maleamate                      |
| 117.0426 | 518667             | 518083   | 612583   | 526750                  | <u>465667</u>   | <u>434167</u>   |                                |
| 117.0578 | 1025583            | 996083   | 839417   | <u>1127000</u>          | <u>1217917</u>  | <u>1135917</u>  | Phenylacetonitrile             |
| 130.0630 | 44775000           | 40800000 | 40066667 | 52075000                | 45783333        | <u>50950000</u> | 4-Methyl-2-oxopentanoate       |
| 130.0742 | 12291667           | 13900833 | 13943333 | 15947500                | <u>18612500</u> | 14072500        |                                |
| 131.0582 | 537500             | 550500   | 534500   | 529417                  | 494250          | <u>407917</u>   | 5-Aminolevulinate              |
| 133.0528 | 779917             | 773833   | 708750   | 738750                  | 800083          | <u>502667</u>   | Indoxyl                        |
| 152.0143 | 592000             | 594750   | 568500   | 458750                  | 539667          | <u>484000</u>   | S-Methylthioglycolate          |
| 154.0379 | 296917             | 282083   | 244750   | 313583                  | <u>323667</u>   | <u>325917</u>   | Imidazol-5-yl-pyruvate         |
| 155.0947 | 112325             | 103092   | 106175   | <u>334833</u>           | <u>850500</u>   | <u>1164917</u>  |                                |
| 155.0948 | 559667             | 551250   | 547000   | 696750                  | <u>1073750</u>  | <u>1608333</u>  |                                |
| 157.1103 | 2273750            | 2282250  | 2145583  | 2302083                 | <u>2344167</u>  | <u>2466417</u>  |                                |
| 158.0942 | 664750             | 627417   | 594417   | 533000                  | <u>499750</u>   | 528500          | Ethyl 3-oxohexanoate, l        |

|          |          |          |          |                 |                 |                 |                                            |
|----------|----------|----------|----------|-----------------|-----------------|-----------------|--------------------------------------------|
| 159.0896 | 3854250  | 3620750  | 3331833  | 2823833         | 2700583         | <u>2140083</u>  | 5-Acetamidopentanoate                      |
| 161.0689 | 747000   | 674167   | 697083   | <u>1019917</u>  | <u>1059333</u>  | <u>1113250</u>  |                                            |
| 163.0667 | 130058   | 110742   | 105008   | 78533           | 90200           | <u>61525</u>    | S-Methyl-L-methionine                      |
| 166.0487 | 692917   | 677833   | 640217   | 549617          | 535500          | <u>442325</u>   | 7-Methylxanthine                           |
| 170.0692 | 4307500  | 4262500  | 3900000  | 3864667         | 3639167         | <u>3255833</u>  | 3-Hydroxy-2-methylpyridine-5-carboxylate   |
| 170.1307 | 1675667  | 1717500  | 1990000  | 1425250         | <u>1236417</u>  | <u>3224167</u>  |                                            |
| 172.1212 | 12063333 | 12887500 | 13035000 | <u>17898333</u> | <u>17323333</u> | <u>17675000</u> |                                            |
| 174.0166 | 477533   | 129192   | 134150   | 126367          | 284042          | <u>500675</u>   | L-Dehydroascorbate                         |
| 176.0586 | 1685250  | 1833333  | 1939250  | 1947583         | 1672417         | <u>1344000</u>  | 4-Hydroxyaminoquinoline N-oxide            |
| 179.0582 | 261900   | 233125   | 204617   | <u>276333</u>   | 323000          | <u>334667</u>   | 3-Succinoylpyridine                        |
| 179.0582 | 542250   | 465167   | 421083   | <u>551917</u>   | <u>656750</u>   | <u>691083</u>   |                                            |
| 185.1052 | 156742   | 158250   | 172083   | <u>517500</u>   | <u>649333</u>   | <u>403583</u>   |                                            |
| 185.1052 | 307167   | 369500   | 351667   | 438583          | 498917          | 387000          | 4-(1-Methyl-2-pyrrolidinyl)-3-oxobutanoate |
| 188.1161 | 103433   | 96808    | 90400    | 111233          | 100342          | <u>130000</u>   | $\gamma$ -Glutamyl-isopropylamide          |
| 190.0776 | 3653333  | 3945000  | 3993333  | <u>4980833</u>  | <u>5149167</u>  | 4486667         |                                            |
| 190.0954 | 373083   | 412250   | 423833   | <u>522250</u>   | 508833          | 484417          | D,D-Diaminopimelate                        |
| 191.0254 | 2379167  | 2003583  | 1880250  | <u>2712000</u>  | 2494167         | 2316667         |                                            |
| 192.1150 | 120117   | 127242   | 125067   | 118317          | 119475          | <u>97592</u>    |                                            |
| 198.1005 | 289475   | 299083   | 266583   | 245133          | 232517          | <u>163517</u>   | 3-Amino-3-(4-hydroxyphenyl)propanoate      |
| 204.1475 | 383917   | 377750   | 357333   | 334417          | <u>298583</u>   | <u>282167</u>   | 3-Hydroxy-N6,N6,N6-trimethyl-L-lysine      |
| 205.0952 | 173008   | 176083   | 174417   | 155825          | <u>144233</u>   | <u>125508</u>   |                                            |
| 206.1056 | 5960833  | 6318333  | 6274167  | <u>7103333</u>  | <u>7229167</u>  | 6620000         |                                            |
| 210.1256 | 308617   | 333417   | 339083   | 286392          | <u>268167</u>   | <u>205125</u>   |                                            |
| 222.0377 | 80042    | 29500    | 35283    | 31033           | 64808           | <u>112075</u>   |                                            |
| 223.1209 | 108875   | 105533   | 106092   | 83083           | <u>78342</u>    | <u>61683</u>    |                                            |

|          |          |          |          |                        |                        |                        |                                                                     |
|----------|----------|----------|----------|------------------------|------------------------|------------------------|---------------------------------------------------------------------|
| 224.1413 | 205367   | 224917   | 229942   | <b><u>168567</u></b>   | <b><u>162233</u></b>   | <b><u>131992</u></b>   |                                                                     |
| 237.1000 | 94992    | 77492    | 75700    | 149308                 | <b><u>178833</u></b>   | 91617                  | 2,6-Dioxo-6-phenylhexanoate                                         |
| 238.0987 | 13006667 | 13102500 | 13274167 | <b><u>15275000</u></b> | <b><u>15283333</u></b> | <b><u>16233333</u></b> |                                                                     |
| 240.1473 | 1238333  | 1355000  | 1342500  | 1157833                | 1175667                | <b><u>1118083</u></b>  |                                                                     |
| 240.2090 | 607833   | 441500   | 533750   | <b><u>329667</u></b>   | <b><u>305333</u></b>   | 550083                 | 2,5-Dimethyl-2E-tridecenoic acid                                    |
| 245.1164 | 3751667  | 4177500  | 4045833  | 4065833                | 4027500                | <b><u>3426667</u></b>  |                                                                     |
| 250.0952 | 129483   | 356483   | 268700   | 166217                 | 98667                  | <b><u>134383</u></b>   |                                                                     |
| 254.1153 | 80425    | 71100    | 71617    | 62050                  | 53933                  | <b><u>45258</u></b>    | Methyl 4-[2-(2-formyl-vinyl)-3-hydroxy-5-oxo-cyclopentyl]-butanoate |
| 256.1215 | 61992    | 57317    | 74975    | 64608                  | 72467                  | <b><u>52492</u></b>    |                                                                     |
| 256.6383 | 559942   | 407158   | 467250   | <b><u>806750</u></b>   | <b><u>831333</u></b>   | <b><u>894500</u></b>   |                                                                     |
| 258.0853 | 1175333  | 1143333  | 1037583  | 920667                 | 908750                 | <b><u>852417</u></b>   | (1-Ribosylimidazole)-4-acetate                                      |
| 261.1320 | 60158    | 50125    | 49108    | 58708                  | 61233                  | <b><u>73075</u></b>    | $\gamma$ -Glutamyl-ornithine                                        |
| 270.1582 | 123808   | 123025   | 128708   | 123750                 | <b><u>95008</u></b>    | <b><u>76983</u></b>    |                                                                     |
| 279.1470 | 1150500  | 1039917  | 1021167  | 1068750                | 1211500                | <b><u>683750</u></b>   |                                                                     |
| 282.0963 | 342667   | 350833   | 365333   | 339500                 | 316333                 | <b><u>302500</u></b>   |                                                                     |
| 285.1364 | 3466750  | 3364500  | 3104675  | 3421500                | 3697967                | <b><u>2736125</u></b>  | N-[(E,E)-Piperoyl]piperidine                                        |
| 286.2146 | 250192   | 179117   | 197500   | 260917                 | 217500                 | <b><u>536000</u></b>   | 2,3-Dihydroxycyclopentaneundecanoic acid                            |
| 327.2408 | 2544083  | 2889250  | 2789667  | 2865083                | 2550583                | <b><u>1659833</u></b>  | 10-Nitro-9E-octadecenoic acid                                       |
| 327.2409 | 2580250  | 2745833  | 2807500  | 2841000                | 2475500                | <b><u>1590583</u></b>  | 9-Nitro-9E-octadecenoic acid                                        |
| 328.2980 | 655250   | 625917   | 660750   | 712083                 | 717917                 | <b><u>843500</u></b>   | L-2-Hydroxyphytanate                                                |
| 332.1377 | 87925    | 99533    | 124100   | 95150                  | 96817                  | <b><u>80233</u></b>    |                                                                     |
| 337.2252 | 396500   | 439000   | 423083   | 370042                 | 352917                 | <b><u>238142</u></b>   |                                                                     |
| 342.1164 | 0        | 0        | 0        | <b><u>58533</u></b>    | <b><u>78517</u></b>    | <b><u>92733</u></b>    | Disaccharide                                                        |
| 342.1166 | 83750    | 71517    | 105025   | <b><u>190575</u></b>   | <b><u>233417</u></b>   | 112875                 | Disaccharide                                                        |

|          |         |         |         |                      |                       |                       |                                                  |
|----------|---------|---------|---------|----------------------|-----------------------|-----------------------|--------------------------------------------------|
| 342.2771 | 296500  | 301083  | 314667  | 280167               | 284417                | <b><u>368333</u></b>  | 1,9S,11R,15S-Tetrahydroxy-13E-prostaene          |
| 343.2721 | 1969417 | 2120833 | 2399167 | 2002667              | <b><u>1632333</u></b> | 3171667               | N-palmitoyl serine                               |
| 345.2515 | 120883  | 132317  | 139333  | 116567               | 111583                | <b><u>79792</u></b>   |                                                  |
| 348.1030 | 28650   | 23875   | 19542   | 132467               | <b><u>256417</u></b>  | <b><u>287308</u></b>  |                                                  |
| 354.2773 | 226250  | 226833  | 213333  | 213125               | 224750                | <b><u>258417</u></b>  |                                                  |
| 355.2358 | 219325  | 212350  | 214333  | 171083               | 149983                | <b><u>95625</u></b>   |                                                  |
| 355.2721 | 748833  | 856333  | 873750  | 773833               | <b><u>691750</u></b>  | <b><u>607833</u></b>  |                                                  |
| 357.2514 | 819000  | 856583  | 875833  | <b><u>609917</u></b> | <b><u>498417</u></b>  | <b><u>487500</u></b>  | 2,3-Dioctanoylglyceramide                        |
| 357.2876 | 719917  | 848917  | 876750  | 881167               | 748917                | <b><u>615917</u></b>  | N-Palmitoyl threonine                            |
| 357.2877 | 400750  | 469833  | 499750  | 531000               | 399000                | <b><u>275917</u></b>  | N-Palmitoyl threonine,1                          |
| 382.2119 | 73700   | 69258   | 66875   | 71708                | 73258                 | <b><u>97558</u></b>   | 1-Tetradecanoyl-2-sn-glycero-3-phosphate         |
| 447.2989 | 62092   | 54150   | 42158   | <b><u>142325</u></b> | <b><u>192050</u></b>  | <b><u>142333</u></b>  |                                                  |
| 455.3248 | 362833  | 380417  | 374083  | 332333               | 312000                | <b><u>285167</u></b>  | 3β-(3-Methyl-butanoyloxy)-villanovane-13α,7-diol |
| 474.9648 | 99500   | 98067   | 98842   | 122700               | 121475                | <b><u>127175</u></b>  | Adenylylselenate                                 |
| 482.3361 | 172750  | 167917  | 49333   | <b><u>661333</u></b> | <b><u>1329500</u></b> | <b><u>857833</u></b>  |                                                  |
| 516.2942 | 114325  | 112608  | 112308  | 126208               | <b><u>152000</u></b>  | <b><u>148658</u></b>  |                                                  |
| 619.5902 | 336917  | 355667  | 366833  | 345833               | 324417                | <b><u>184167</u></b>  | Ceramide (d40:2)                                 |
| 647.6215 | 1383917 | 1433833 | 1418500 | 1347917              | 1272583               | <b><u>1040583</u></b> | N-(15Z-tetracosenoyl)-sphing-4-enine             |
| 702.5675 | 2062500 | 2320000 | 2127500 | 2457500              | 2241667               | <b><u>2600833</u></b> | N-(hexadecanoyl)-sphing-4-enine-1-phosphocholine |

70

71 Values are peak intensities. Only compounds (bold and underlined) that showed a significant change ( $p < 0.01$ ) are included. Any compounds  
72 that changed during the control period are excluded. Mass, exact mass. Tentatively identified named compounds were automatically identified  
73 based on exact mass and retention time, but are not in the human metabolite database.

74 **Supplementary Table 8.** Proteins that changed in plasma after the HFHCM

| Protein ID | Gene name | ANOVA Adjusted <i>p</i> -value | Control period            |                          |                         | Experimental period      |                          |                          |                          |                          |
|------------|-----------|--------------------------------|---------------------------|--------------------------|-------------------------|--------------------------|--------------------------|--------------------------|--------------------------|--------------------------|
|            |           |                                | -120 min Log2 Fold change | -60 min Log2 Fold change | 60 min Log2 Fold change | 120 min Log2 Fold change | 180 min Log2 Fold change | 240 min Log2 Fold change | 300 min Log2 Fold change | 360 min Log2 Fold change |
| P00558     | PGK1      | 2.64E-12                       | 0.0001                    | -0.0167                  | 0.0046                  | -0.0051                  | -0.0254                  | <b><u>-0.0934</u></b>    | <b><u>-0.0813</u></b>    | -0.0038                  |
| Q99497     | PARK7     | 2.64E-12                       | -0.0018                   | -0.0263                  | 0.0010                  | -0.0142                  | -0.0321                  | <b><u>-0.1084</u></b>    | <b><u>-0.0961</u></b>    | -0.0140                  |
| P62258     | YWHAE     | 2.78E-12                       | 0.0008                    | -0.0208                  | 0.0037                  | 0.0043                   | -0.0091                  | <b><u>-0.1046</u></b>    | <b><u>-0.0909</u></b>    | -0.0027                  |
| P26447     | S100A4    | 3.75E-12                       | -0.0012                   | -0.0261                  | 0.0051                  | -0.0106                  | -0.0359                  | <b><u>-0.1106</u></b>    | <b><u>-0.1005</u></b>    | -0.0167                  |
| P55072     | VCP       | 2.38E-11                       | -0.0021                   | -0.0257                  | 0.0022                  | -0.0025                  | -0.0229                  | <b><u>-0.1018</u></b>    | <b><u>-0.0923</u></b>    | -0.0099                  |
| P99999     | CYCS      | 2.38E-11                       | 0.0314                    | -0.0045                  | 0.0208                  | 0.0072                   | -0.0119                  | <b><u>-0.0955</u></b>    | <b><u>-0.0805</u></b>    | 0.0125                   |
| P62937     | PPIA      | 2.44E-11                       | 0.0056                    | -0.0072                  | 0.0168                  | 0.0018                   | -0.0161                  | <b><u>-0.0819</u></b>    | <b><u>-0.0743</u></b>    | -0.0009                  |
| P06576     | ATP5F1B   | 2.44E-11                       | 0.0035                    | -0.0124                  | 0.0203                  | 0.0166                   | -0.0097                  | <b><u>-0.0941</u></b>    | <b><u>-0.0861</u></b>    | 0.0066                   |
| P00441     | SOD1      | 2.44E-11                       | -0.0057                   | -0.0351                  | -0.0076                 | -0.0259                  | -0.0483                  | <b><u>-0.1059</u></b>    | <b><u>-0.0953</u></b>    | -0.0299                  |
| P60953     | CDC42     | 2.44E-11                       | 0.0108                    | -0.0109                  | 0.0216                  | 0.0037                   | -0.0159                  | <b><u>-0.1037</u></b>    | <b><u>-0.0942</u></b>    | 0.0059                   |
| P10599     | TXN       | 2.44E-11                       | 0.0046                    | -0.0247                  | -0.0034                 | -0.0121                  | -0.0423                  | <b><u>-0.1019</u></b>    | <b><u>-0.0903</u></b>    | -0.0129                  |
| P60174     | TPI1      | 2.86E-11                       | -0.0057                   | -0.0219                  | 0.0034                  | -0.0100                  | -0.0253                  | <b><u>-0.1003</u></b>    | <b><u>-0.0913</u></b>    | -0.0074                  |
| P58546     | MTPN      | 2.86E-11                       | 0.0154                    | -0.0121                  | 0.0157                  | -0.0010                  | -0.0213                  | <b><u>-0.0997</u></b>    | <b><u>-0.0906</u></b>    | 0.0009                   |
| P37840     | SNCA      | 3.66E-11                       | 0.0064                    | -0.0250                  | 0.0005                  | -0.0160                  | -0.0367                  | <b><u>-0.0890</u></b>    | <b><u>-0.0802</u></b>    | -0.0136                  |
| P30041     | PRDX6     | 3.9E-11                        | -0.0113                   | -0.0326                  | -0.0083                 | -0.0228                  | -0.0435                  | <b><u>-0.1078</u></b>    | <b><u>-0.1015</u></b>    | -0.0257                  |
| Q05682     | CALD1     | 4.78E-11                       | 0.0181                    | -0.0062                  | 0.0161                  | -0.0060                  | -0.0164                  | <b><u>-0.0973</u></b>    | <b><u>-0.0909</u></b>    | 0.0093                   |
| Q3ZCW2     | LGALS1    | 5.77E-11                       | 0.0115                    | -0.0087                  | 0.0197                  | 0.0133                   | -0.0126                  | <b><u>-0.0924</u></b>    | <b><u>-0.0883</u></b>    | 0.0104                   |
| P62987     | UBA52     | 9.18E-11                       | -0.0125                   | -0.0425                  | -0.0142                 | -0.0307                  | -0.0462                  | <b><u>-0.1047</u></b>    | <b><u>-0.0906</u></b>    | -0.0256                  |
| P40227     | CCT6A     | 1E-10                          | -0.0101                   | -0.0221                  | 0.0094                  | 0.0021                   | -0.0214                  | <b><u>-0.1161</u></b>    | <b><u>-0.1111</u></b>    | -0.0069                  |
| P20073     | ANXA7     | 1E-10                          | 0.0016                    | -0.0252                  | -0.0057                 | -0.0065                  | -0.0308                  | <b><u>-0.1264</u></b>    | <b><u>-0.1328</u></b>    | -0.0268                  |
| P48426     | PIP4K2A   | 1.22E-10                       | 0.0003                    | -0.0177                  | 0.0114                  | -0.0043                  | -0.0243                  | <b><u>-0.1223</u></b>    | <b><u>-0.1282</u></b>    | -0.0016                  |
| P37802     | TAGLN2    | 1.65E-10                       | 0.0140                    | -0.0042                  | 0.0168                  | 0.0037                   | -0.0106                  | <b><u>-0.0812</u></b>    | <b><u>-0.0764</u></b>    | 0.0080                   |
| P06753     | TPM3      | 1.86E-10                       | 0.0047                    | -0.0141                  | 0.0182                  | 0.0058                   | -0.0128                  | <b><u>-0.0977</u></b>    | <b><u>-0.0816</u></b>    | 0.0067                   |
| Q06830     | PRDX1     | 1.91E-10                       | -0.0068                   | -0.0341                  | -0.0084                 | -0.0202                  | -0.0426                  | <b><u>-0.1078</u></b>    | <b><u>-0.0988</u></b>    | -0.0236                  |
| P04075     | ALDOA     | 2.28E-10                       | 0.0055                    | -0.0045                  | 0.0150                  | 0.0026                   | -0.0093                  | <b><u>-0.0721</u></b>    | <b><u>-0.0661</u></b>    | 0.0035                   |

| Protein ID | Gene name | ANOVA Adjusted p-value | Control period            |                          |                         | Experimental period      |                          |                          |                          |                          |
|------------|-----------|------------------------|---------------------------|--------------------------|-------------------------|--------------------------|--------------------------|--------------------------|--------------------------|--------------------------|
|            |           |                        | -120 min Log2 Fold change | -60 min Log2 Fold change | 60 min Log2 Fold change | 120 min Log2 Fold change | 180 min Log2 Fold change | 240 min Log2 Fold change | 300 min Log2 Fold change | 360 min Log2 Fold change |
| Q9NY65     | TUBA8     | 2.28E-10               | 0.0062                    | -0.0087                  | 0.0183                  | 0.0107                   | -0.0058                  | <b><u>-0.1045</u></b>    | <b><u>-0.0905</u></b>    | 0.0122                   |
| Q15691     | MAPRE1    | 2.28E-10               | 0.0107                    | -0.0198                  | 0.0081                  | -0.0090                  | -0.0182                  | <b><u>-0.1137</u></b>    | <b><u>-0.1042</u></b>    | 0.0039                   |
| P06733     | ENO1      | 2.36E-10               | 0.0094                    | -0.0082                  | 0.0146                  | -0.0001                  | -0.0147                  | <b><u>-0.0803</u></b>    | <b><u>-0.0751</u></b>    | 0.0021                   |
| P07737     | PFN1      | 2.36E-10               | 0.0096                    | -0.0069                  | 0.0195                  | 0.0024                   | -0.0098                  | <b><u>-0.0774</u></b>    | <b><u>-0.0774</u></b>    | 0.0066                   |
| P50502     | ST13      | 2.36E-10               | -0.0193                   | -0.0386                  | -0.0104                 | -0.0250                  | -0.0511                  | <b><u>-0.1304</u></b>    | <b><u>-0.1197</u></b>    | -0.0274                  |
| P13501     | CCL5      | 2.41E-10               | 0.0143                    | -0.0081                  | 0.0245                  | 0.0143                   | -0.0188                  | <b><u>-0.1179</u></b>    | <b><u>-0.0999</u></b>    | 0.0127                   |
| P50990     | CCT8      | 2.46E-10               | 0.0044                    | -0.0152                  | 0.0099                  | -0.0088                  | -0.0149                  | <b><u>-0.1083</u></b>    | <b><u>-0.1049</u></b>    | -0.0029                  |
| P05556     | ITGB1     | 3.71E-10               | 0.0055                    | -0.0053                  | 0.0127                  | 0.0080                   | -0.0078                  | <b><u>-0.0575</u></b>    | <b><u>-0.0476</u></b>    | 0.0055                   |
| P07195     | LDHB      | 3.85E-10               | -0.0098                   | -0.0162                  | 0.0013                  | -0.0038                  | -0.0205                  | <b><u>-0.0743</u></b>    | <b><u>-0.0706</u></b>    | -0.0062                  |
| Q14847     | LASP1     | 4.08E-10               | 0.0168                    | -0.0050                  | 0.0163                  | -0.0048                  | -0.0228                  | <b><u>-0.1067</u></b>    | <b><u>-0.0970</u></b>    | 0.0074                   |
| O94919     | ENDOD1    | 4.17E-10               | 0.0043                    | -0.0027                  | 0.0192                  | 0.0130                   | -0.0060                  | <b><u>-0.1015</u></b>    | <b><u>-0.0952</u></b>    | 0.0112                   |
| P60028     | GDI1      | 4.87E-10               | 0.0011                    | -0.0210                  | 0.0103                  | -0.0095                  | -0.0200                  | <b><u>-0.1020</u></b>    | <b><u>-0.0970</u></b>    | -0.0026                  |
| O15511     | ARPC5     | 4.87E-10               | 0.0061                    | -0.0111                  | 0.0151                  | -0.0018                  | -0.0110                  | <b><u>-0.1025</u></b>    | <b><u>-0.0956</u></b>    | 0.0035                   |
| P02775     | PPBP      | 5.02E-10               | 0.0176                    | -0.0078                  | 0.0267                  | 0.0157                   | -0.0243                  | <b><u>-0.0882</u></b>    | <b><u>-0.0870</u></b>    | 0.0051                   |
| P26038     | MSN       | 5.29E-10               | 0.0038                    | -0.0065                  | 0.0140                  | 0.0050                   | -0.0118                  | <b><u>-0.0718</u></b>    | <b><u>-0.0699</u></b>    | 0.0026                   |
| P38606     | ATP6V1A   | 5.29E-10               | -0.0105                   | -0.0208                  | 0.0099                  | -0.0011                  | -0.0217                  | <b><u>-0.1212</u></b>    | <b><u>-0.1256</u></b>    | -0.0017                  |
| Q13201     | MMRN1     | 5.45E-10               | 0.0003                    | -0.0100                  | 0.0196                  | 0.0093                   | -0.0115                  | <b><u>-0.0891</u></b>    | <b><u>-0.0873</u></b>    | 0.0046                   |
| O00151     | PDLIM1    | 5.45E-10               | 0.0175                    | -0.0036                  | 0.0230                  | 0.0066                   | <b><u>-0.0038</u></b>    | <b><u>-0.0855</u></b>    | <b><u>-0.0822</u></b>    | 0.0144                   |
| Q00610     | CLTC      | 5.45E-10               | 0.0051                    | -0.0056                  | 0.0154                  | 0.0071                   | -0.0127                  | <b><u>-0.0878</u></b>    | <b><u>-0.0885</u></b>    | 0.0023                   |
| O00299     | CLIC1     | 5.45E-10               | 0.0169                    | -0.0021                  | 0.0255                  | 0.0076                   | -0.0092                  | <b><u>-0.0950</u></b>    | <b><u>-0.0855</u></b>    | 0.0112                   |
| P09486     | SPARC     | 5.45E-10               | 0.0015                    | -0.0120                  | 0.0188                  | 0.0150                   | -0.0153                  | <b><u>-0.0986</u></b>    | <b><u>-0.0982</u></b>    | 0.0006                   |
| P40925     | MDH1      | 5.76E-10               | -0.0087                   | -0.0288                  | -0.0095                 | -0.0167                  | -0.0333                  | <b><u>-0.1028</u></b>    | <b><u>-0.0961</u></b>    | -0.0124                  |
| P02776     | PF4       | 8.13E-10               | 0.0118                    | -0.0083                  | 0.0242                  | 0.0170                   | -0.0214                  | <b><u>-0.0886</u></b>    | <b><u>-0.0864</u></b>    | 0.0059                   |
| Q14019     | COTL1     | 8.13E-10               | 0.0126                    | -0.0077                  | 0.0245                  | 0.0069                   | -0.0172                  | <b><u>-0.1108</u></b>    | <b><u>-0.0995</u></b>    | 0.0088                   |
| P30740     | SERPINB1  | 9.95E-10               | 0.0077                    | -0.0071                  | 0.0171                  | 0.0082                   | -0.0087                  | <b><u>-0.0791</u></b>    | <b><u>-0.0730</u></b>    | 0.0047                   |
| O15143     | ARPC1B    | 1.1E-09                | 0.0168                    | 0.0000                   | 0.0254                  | 0.0217                   | -0.0070                  | <b><u>-0.0889</u></b>    | <b><u>-0.0840</u></b>    | 0.0174                   |

| Protein ID | Gene name | ANOVA Adjusted <i>p</i> -value | Control period            |                          |                         | Experimental period      |                          |                          |                          |                          |
|------------|-----------|--------------------------------|---------------------------|--------------------------|-------------------------|--------------------------|--------------------------|--------------------------|--------------------------|--------------------------|
|            |           |                                | -120 min Log2 Fold change | -60 min Log2 Fold change | 60 min Log2 Fold change | 120 min Log2 Fold change | 180 min Log2 Fold change | 240 min Log2 Fold change | 300 min Log2 Fold change | 360 min Log2 Fold change |
| P07996     | THBS1     | 1.59E-09                       | -0.0026                   | -0.0060                  | 0.0204                  | 0.0107                   | -0.0095                  | <b><u>-0.0853</u></b>    | <b><u>-0.0848</u></b>    | 0.0032                   |
| P11021     | HSPA5     | 1.67E-09                       | 0.0032                    | -0.0038                  | 0.0093                  | 0.0033                   | -0.0051                  | <b><u>-0.0456</u></b>    | <b><u>-0.0421</u></b>    | 0.0022                   |
| Q9NR12     | PDLIM7    | 1.7E-09                        | 0.0130                    | -0.0041                  | 0.0273                  | 0.0034                   | -0.0067                  | <b><u>-0.1111</u></b>    | <b><u>-0.1042</u></b>    | 0.0089                   |
| P52565     | ARHGDIA   | 1.7E-09                        | 0.0156                    | -0.0120                  | 0.0115                  | -0.0044                  | -0.0185                  | <b><u>-0.0978</u></b>    | <b><u>-0.0912</u></b>    | 0.0024                   |
| P07359     | GP1BA     | 2.15E-09                       | 0.0034                    | -0.0044                  | 0.0159                  | 0.0125                   | <b><u>-0.0003</u></b>    | <b><u>-0.0637</u></b>    | <b><u>-0.0520</u></b>    | 0.0072                   |
| P09496     | CLTA      | 2.47E-09                       | 0.0129                    | -0.0126                  | 0.0133                  | 0.0096                   | -0.0137                  | <b><u>-0.1202</u></b>    | <b><u>-0.1029</u></b>    | 0.0043                   |
| Q14247     | CTTN      | 2.86E-09                       | 0.0226                    | 0.0002                   | 0.0201                  | -0.0040                  | -0.0108                  | <b><u>-0.0926</u></b>    | <b><u>-0.0883</u></b>    | 0.0137                   |
| P29350     | PTPN6     | 3.46E-09                       | -0.0046                   | -0.0128                  | 0.0090                  | 0.0069                   | -0.0215                  | <b><u>-0.0952</u></b>    | <b><u>-0.0935</u></b>    | 0.0012                   |
| P23528     | CFL1      | 3.47E-09                       | 0.0027                    | -0.0071                  | 0.0195                  | 0.0021                   | -0.0108                  | <b><u>-0.0843</u></b>    | <b><u>-0.0800</u></b>    | 0.0069                   |
| P61981     | YWHAG     | 3.52E-09                       | 0.0001                    | -0.0080                  | 0.0210                  | 0.0044                   | -0.0118                  | <b><u>-0.1142</u></b>    | <b><u>-0.1053</u></b>    | 0.0033                   |
| P61224     | RAP1B     | 3.89E-09                       | 0.0096                    | -0.0038                  | 0.0209                  | 0.0043                   | -0.0087                  | <b><u>-0.0798</u></b>    | <b><u>-0.0768</u></b>    | 0.0093                   |
| P55145     | MANF      | 3.94E-09                       | 0.0056                    | -0.0086                  | 0.0163                  | -0.0042                  | -0.0135                  | <b><u>-0.1012</u></b>    | <b><u>-0.0916</u></b>    | 0.0073                   |
| Q7L591     | DOK3      | 4.08E-09                       | 0.0195                    | 0.0108                   | 0.0058                  | 0.0032                   | -0.0351                  | <b><u>-0.1524</u></b>    | <b><u>-0.1144</u></b>    | 0.0080                   |
| O14745     | SLC9A3R1  | 4.23E-09                       | 0.0236                    | -0.0128                  | 0.0280                  | 0.0058                   | <b><u>0.0044</u></b>     | <b><u>-0.1112</u></b>    | <b><u>-0.1000</u></b>    | 0.0108                   |
| P11142     | HSPA8     | 4.68E-09                       | -0.0064                   | -0.0129                  | 0.0118                  | -0.0004                  | -0.0143                  | <b><u>-0.0894</u></b>    | <b><u>-0.0816</u></b>    | 0.0003                   |
| P52566     | ARHGDIB   | 4.97E-09                       | 0.0073                    | -0.0112                  | 0.0086                  | -0.0083                  | -0.0206                  | <b><u>-0.0963</u></b>    | <b><u>-0.0853</u></b>    | 0.0036                   |
| P10809     | HSPD1     | 5.27E-09                       | -0.0003                   | -0.0094                  | 0.0186                  | 0.0075                   | -0.0138                  | <b><u>-0.1180</u></b>    | <b><u>-0.1120</u></b>    | 0.0059                   |
| P09211     | GSTP1     | 5.75E-09                       | 0.0094                    | -0.0130                  | 0.0133                  | -0.0021                  | -0.0168                  | <b><u>-0.0797</u></b>    | <b><u>-0.0838</u></b>    | 0.0042                   |
| Q9UBW5     | BIN2      | 6.57E-09                       | 0.0078                    | -0.0070                  | 0.0144                  | 0.0000                   | -0.0115                  | <b><u>-0.0853</u></b>    | <b><u>-0.0876</u></b>    | 0.0087                   |
| P01137     | TGFB1     | 6.57E-09                       | -0.0092                   | -0.0131                  | 0.0164                  | 0.0109                   | -0.0148                  | <b><u>-0.1056</u></b>    | <b><u>-0.0909</u></b>    | 0.0034                   |
| P62942     | FKBP1A    | 8.13E-09                       | 0.0023                    | -0.0162                  | 0.0115                  | -0.0074                  | -0.0260                  | <b><u>-0.1099</u></b>    | <b><u>-0.1090</u></b>    | -0.0082                  |
| Q9Y490     | TLN1      | 9.23E-09                       | 0.0041                    | -0.0028                  | 0.0180                  | 0.0034                   | -0.0058                  | <b><u>-0.0717</u></b>    | <b><u>-0.0686</u></b>    | 0.0084                   |
| Q15555     | MAPRE2    | 9.94E-09                       | 0.0085                    | -0.0021                  | 0.0198                  | 0.0020                   | -0.0093                  | <b><u>-0.0852</u></b>    | <b><u>-0.0860</u></b>    | 0.0118                   |
| Q13586     | STIM1     | 9.94E-09                       | -0.0075                   | -0.0170                  | 0.0119                  | -0.0026                  | -0.0104                  | <b><u>-0.1115</u></b>    | <b><u>-0.1060</u></b>    | 0.0031                   |
| P00338     | LDHA      | 1.06E-08                       | 0.0003                    | -0.0073                  | 0.0116                  | -0.0011                  | -0.0204                  | <b><u>-0.0790</u></b>    | <b><u>-0.0736</u></b>    | 0.0059                   |
| P00491     | PNP       | 1.06E-08                       | -0.0055                   | -0.0217                  | -0.0009                 | -0.0119                  | -0.0352                  | <b><u>-0.1025</u></b>    | <b><u>-0.0962</u></b>    | -0.0140                  |

| Protein ID | Gene name | ANOVA Adjusted <i>p</i> -value | Control period            |                          |                         | Experimental period      |                          |                          |                          |                          |
|------------|-----------|--------------------------------|---------------------------|--------------------------|-------------------------|--------------------------|--------------------------|--------------------------|--------------------------|--------------------------|
|            |           |                                | -120 min Log2 Fold change | -60 min Log2 Fold change | 60 min Log2 Fold change | 120 min Log2 Fold change | 180 min Log2 Fold change | 240 min Log2 Fold change | 300 min Log2 Fold change | 360 min Log2 Fold change |
| P04406     | GAPDH     | 1.07E-08                       | -0.0058                   | -0.0146                  | 0.0095                  | -0.0030                  | -0.0189                  | <b><u>-0.0888</u></b>    | <b><u>-0.0847</u></b>    | -0.0047                  |
| P06744     | GPI       | 1.1E-08                        | -0.0037                   | -0.0110                  | 0.0099                  | -0.0031                  | -0.0174                  | <b><u>-0.0885</u></b>    | <b><u>-0.0897</u></b>    | 0.0020                   |
| P04179     | SOD2      | 1.72E-08                       | 0.0007                    | -0.0085                  | 0.0165                  | 0.0129                   | -0.0107                  | <b><u>-0.0813</u></b>    | <b><u>-0.0825</u></b>    | 0.0070                   |
| P61158     | ACTR3     | 1.77E-08                       | 0.0001                    | -0.0087                  | 0.0175                  | -0.0027                  | -0.0197                  | <b><u>-0.0968</u></b>    | <b><u>-0.0997</u></b>    | 0.0042                   |
| Q99439     | CNN2      | 1.81E-08                       | 0.0185                    | 0.0017                   | 0.0220                  | -0.0075                  | -0.0116                  | <b><u>-0.0941</u></b>    | <b><u>-0.0921</u></b>    | 0.0111                   |
| P18206     | VCL       | 1.85E-08                       | 0.0022                    | -0.0070                  | 0.0148                  | 0.0028                   | -0.0045                  | <b><u>-0.0730</u></b>    | <b><u>-0.0705</u></b>    | 0.0066                   |
| P14625     | HSP90B1   | 2.02E-08                       | -0.0001                   | -0.0049                  | 0.0140                  | 0.0080                   | -0.0074                  | <b><u>-0.0533</u></b>    | <b><u>-0.0502</u></b>    | 0.0022                   |
| P17987     | TCP1      | 2.02E-08                       | -0.0071                   | -0.0228                  | 0.0097                  | 0.0052                   | -0.0223                  | <b><u>-0.1223</u></b>    | <b><u>-0.1042</u></b>    | 0.0018                   |
| P16284     | PECAM1    | 2.3E-08                        | 0.0132                    | 0.0040                   | 0.0307                  | 0.0250                   | <b><u>0.0070</u></b>     | <b><u>-0.0906</u></b>    | <b><u>-0.0819</u></b>    | 0.0134                   |
| P35237     | SERPINB6  | 2.78E-08                       | 0.0030                    | -0.0229                  | 0.0024                  | -0.0066                  | -0.0238                  | <b><u>-0.1065</u></b>    | <b><u>-0.1035</u></b>    | 0.0015                   |
| Q9H0U4     | RAB1B     | 3.01E-08                       | 0.0129                    | -0.0120                  | 0.0314                  | 0.0148                   | -0.0122                  | <b><u>-0.1231</u></b>    | <b><u>-0.1064</u></b>    | 0.0132                   |
| P60660     | MYL6      | 3.04E-08                       | 0.0006                    | -0.0032                  | 0.0260                  | 0.0076                   | -0.0047                  | <b><u>-0.0946</u></b>    | <b><u>-0.0942</u></b>    | 0.0060                   |
| Q5IS80     | APP       | 3.64E-08                       | -0.0012                   | -0.0117                  | 0.0331                  | 0.0200                   | -0.0223                  | <b><u>-0.1171</u></b>    | <b><u>-0.1038</u></b>    | 0.0121                   |
| P07203     | GPX1      | 3.65E-08                       | -0.0184                   | -0.0319                  | 0.0031                  | -0.0175                  | -0.0231                  | <b><u>-0.1026</u></b>    | <b><u>-0.1136</u></b>    | -0.0193                  |
| P07237     | P4HB      | 3.7E-08                        | 0.0042                    | -0.0047                  | 0.0101                  | 0.0016                   | -0.0111                  | <b><u>-0.0640</u></b>    | <b><u>-0.0605</u></b>    | 0.0031                   |
| Q6IBS0     | TWF2      | 3.83E-08                       | -0.0095                   | -0.0138                  | 0.0160                  | -0.0038                  | -0.0123                  | <b><u>-0.1214</u></b>    | <b><u>-0.1060</u></b>    | 0.0070                   |
| P07384     | CAPN1     | 3.95E-08                       | -0.0031                   | -0.0104                  | 0.0121                  | 0.0022                   | -0.0163                  | <b><u>-0.0786</u></b>    | <b><u>-0.0788</u></b>    | 0.0029                   |
| P50552     | VASP      | 4.32E-08                       | 0.0056                    | -0.0057                  | 0.0205                  | -0.0016                  | -0.0124                  | <b><u>-0.0974</u></b>    | <b><u>-0.0956</u></b>    | 0.0105                   |
| P60842     | EIF4A1    | 4.49E-08                       | -0.0145                   | -0.0185                  | 0.0067                  | -0.0091                  | -0.0217                  | <b><u>-0.1224</u></b>    | <b><u>-0.1174</u></b>    | -0.0007                  |
| P04899     | GNAI2     | 4.69E-08                       | -0.0053                   | -0.0093                  | 0.0163                  | 0.0060                   | -0.0072                  | <b><u>-0.0956</u></b>    | <b><u>-0.0985</u></b>    | 0.0115                   |
| Q01518     | CAP1      | 5.58E-08                       | -0.0020                   | -0.0067                  | 0.0175                  | 0.0000                   | -0.0105                  | <b><u>-0.0845</u></b>    | <b><u>-0.0811</u></b>    | 0.0073                   |
| P11413     | G6PD      | 5.8E-08                        | -0.0040                   | -0.0132                  | 0.0171                  | 0.0007                   | -0.0229                  | <b><u>-0.1167</u></b>    | <b><u>-0.1062</u></b>    | 0.0064                   |
| P30086     | PEBP1     | 6.13E-08                       | -0.0241                   | -0.0564                  | -0.0270                 | -0.0178                  | -0.0773                  | <b><u>-0.1223</u></b>    | <b><u>-0.0921</u></b>    | -0.0257                  |
| P25705     | ATP5F1A   | 6.28E-08                       | -0.0058                   | -0.0097                  | 0.0232                  | 0.0064                   | -0.0082                  | <b><u>-0.0978</u></b>    | <b><u>-0.0915</u></b>    | 0.0055                   |
| O43488     | AKR7A2    | 6.32E-08                       | -0.0109                   | -0.0141                  | 0.0192                  | 0.0022                   | -0.0170                  | <b><u>-0.1159</u></b>    | <b><u>-0.1141</u></b>    | -0.0011                  |
| P50148     | GNAQ      | 6.52E-08                       | 0.0002                    | -0.0058                  | 0.0247                  | 0.0115                   | -0.0079                  | <b><u>-0.0972</u></b>    | <b><u>-0.1021</u></b>    | 0.0080                   |

| Protein ID | Gene name | ANOVA Adjusted <i>p</i> -value | Control period            |                          |                         | Experimental period      |                          |                          |                          |                          |
|------------|-----------|--------------------------------|---------------------------|--------------------------|-------------------------|--------------------------|--------------------------|--------------------------|--------------------------|--------------------------|
|            |           |                                | -120 min Log2 Fold change | -60 min Log2 Fold change | 60 min Log2 Fold change | 120 min Log2 Fold change | 180 min Log2 Fold change | 240 min Log2 Fold change | 300 min Log2 Fold change | 360 min Log2 Fold change |
| Q70J99     | UNC13D    | 7.44E-08                       | 0.0061                    | -0.0103                  | 0.0192                  | 0.0155                   | <b><u>-0.0029</u></b>    | <b><u>-0.0850</u></b>    | <b><u>-0.0676</u></b>    | 0.0095                   |
| P19367     | HK1       | 8.13E-08                       | 0.0024                    | -0.0051                  | 0.0211                  | 0.0051                   | -0.0118                  | <b><u>-0.1047</u></b>    | <b><u>-0.1004</u></b>    | 0.0097                   |
| P23284     | PPIB      | 8.13E-08                       | 0.0043                    | -0.0049                  | 0.0208                  | 0.0052                   | -0.0092                  | <b><u>-0.0825</u></b>    | <b><u>-0.0776</u></b>    | 0.0094                   |
| P62820     | RAB1A     | 8.4E-08                        | 0.0047                    | 0.0020                   | 0.0287                  | 0.0129                   | -0.0100                  | <b><u>-0.0895</u></b>    | <b><u>-0.0848</u></b>    | 0.0100                   |
| Q15907     | RAB11B    | 8.56E-08                       | 0.0023                    | -0.0045                  | 0.0208                  | 0.0054                   | -0.0101                  | <b><u>-0.0936</u></b>    | <b><u>-0.0975</u></b>    | 0.0082                   |
| P0DMV9     | HSPA1B    | 8.73E-08                       | -0.0048                   | -0.0112                  | 0.0130                  | 0.0031                   | -0.0126                  | <b><u>-0.0829</u></b>    | <b><u>-0.0650</u></b>    | 0.0035                   |
| Q9NYL9     | TMOD3     | 9.71E-08                       | 0.0171                    | -0.0042                  | 0.0242                  | -0.0023                  | -0.0118                  | <b><u>-0.1019</u></b>    | <b><u>-0.1075</u></b>    | 0.0084                   |
| Q15833     | STXBP2    | 9.78E-08                       | 0.0020                    | -0.0044                  | 0.0200                  | 0.0069                   | <b><u>-0.0014</u></b>    | <b><u>-0.0919</u></b>    | <b><u>-0.0824</u></b>    | 0.0103                   |
| P40197     | GP5       | 1.02E-07                       | -0.0038                   | -0.0162                  | 0.0153                  | 0.0087                   | -0.0062                  | <b><u>-0.0941</u></b>    | <b><u>-0.0835</u></b>    | 0.0091                   |
| P61204     | ARF3      | 1.06E-07                       | 0.0027                    | -0.0123                  | 0.0082                  | -0.0002                  | -0.0269                  | <b><u>-0.0853</u></b>    | <b><u>-0.0853</u></b>    | 0.0000                   |
| P30101     | PDIA3     | 1.19E-07                       | -0.0023                   | -0.0055                  | 0.0170                  | 0.0019                   | -0.0101                  | <b><u>-0.0757</u></b>    | <b><u>-0.0697</u></b>    | 0.0063                   |
| P11169     | SLC2A3    | 1.2E-07                        | -0.0030                   | -0.0076                  | 0.0245                  | 0.0018                   | -0.0094                  | <b><u>-0.1116</u></b>    | <b><u>-0.1145</u></b>    | 0.0058                   |
| P07900     | HSP90AA1  | 1.39E-07                       | -0.0062                   | -0.0123                  | 0.0109                  | 0.0007                   | -0.0157                  | <b><u>-0.0841</u></b>    | <b><u>-0.0808</u></b>    | 0.0009                   |
| P67936     | TPM4      | 1.53E-07                       | -0.0006                   | -0.0046                  | 0.0197                  | 0.0002                   | -0.0092                  | <b><u>-0.0796</u></b>    | <b><u>-0.0752</u></b>    | 0.0062                   |
| P48059     | LIMS1     | 1.53E-07                       | -0.0041                   | -0.0045                  | 0.0222                  | 0.0082                   | -0.0127                  | <b><u>-0.0925</u></b>    | <b><u>-0.0840</u></b>    | 0.0085                   |
| Q0ZGT2     | NEXN      | 1.76E-07                       | 0.0069                    | -0.0070                  | 0.0184                  | 0.0032                   | <b><u>0.0009</u></b>     | <b><u>-0.1046</u></b>    | <b><u>-0.0858</u></b>    | 0.0073                   |
| P08758     | ANXA5     | 1.76E-07                       | 0.0118                    | -0.0133                  | 0.0188                  | -0.0055                  | -0.0247                  | <b><u>-0.1233</u></b>    | <b><u>-0.1135</u></b>    | -0.0013                  |
| P48735     | IDH2      | 1.79E-07                       | -0.0098                   | -0.0126                  | 0.0225                  | 0.0071                   | -0.0123                  | <b><u>-0.1065</u></b>    | <b><u>-0.1062</u></b>    | 0.0038                   |
| P12931     | SRC       | 1.81E-07                       | -0.0101                   | -0.0090                  | 0.0159                  | 0.0064                   | -0.0144                  | <b><u>-0.0977</u></b>    | <b><u>-0.0874</u></b>    | 0.0055                   |
| Q15404     | RSU1      | 1.94E-07                       | 0.0056                    | -0.0070                  | 0.0165                  | 0.0049                   | -0.0131                  | <b><u>-0.0895</u></b>    | <b><u>-0.0851</u></b>    | 0.0069                   |
| P60709     | ACTB      | 2.08E-07                       | -0.0025                   | -0.0011                  | 0.0211                  | 0.0066                   | -0.0034                  | <b><u>-0.0698</u></b>    | <b><u>-0.0695</u></b>    | 0.0093                   |
| O14950     | MYL12B    | 2.08E-07                       | -0.0053                   | -0.0083                  | 0.0165                  | 0.0019                   | -0.0104                  | <b><u>-0.0922</u></b>    | <b><u>-0.1005</u></b>    | 0.0072                   |
| P59998     | ARPC4     | 2.08E-07                       | -0.0084                   | -0.0109                  | 0.0163                  | -0.0039                  | -0.0166                  | <b><u>-0.1165</u></b>    | <b><u>-0.1078</u></b>    | 0.0013                   |
| O00161     | SNAP23    | 2.14E-07                       | 0.0000                    | -0.0107                  | 0.0201                  | -0.0158                  | -0.0194                  | <b><u>-0.1232</u></b>    | <b><u>-0.1129</u></b>    | 0.0103                   |
| P51149     | RAB7A     | 2.14E-07                       | 0.0028                    | -0.0098                  | 0.0195                  | 0.0060                   | -0.0059                  | <b><u>-0.0991</u></b>    | <b><u>-0.0906</u></b>    | 0.0092                   |
| Q9BS26     | ERP44     | 2.14E-07                       | 0.0183                    | 0.0092                   | 0.0303                  | 0.0266                   | <b><u>0.0077</u></b>     | <b><u>-0.0788</u></b>    | <b><u>-0.0550</u></b>    | 0.0233                   |

| Protein ID | Gene name | ANOVA Adjusted p-value | Control period            |                          |                         | Experimental period      |                          |                          |                          |                          |
|------------|-----------|------------------------|---------------------------|--------------------------|-------------------------|--------------------------|--------------------------|--------------------------|--------------------------|--------------------------|
|            |           |                        | -120 min Log2 Fold change | -60 min Log2 Fold change | 60 min Log2 Fold change | 120 min Log2 Fold change | 180 min Log2 Fold change | 240 min Log2 Fold change | 300 min Log2 Fold change | 360 min Log2 Fold change |
| Q14697     | GANAB     | 2.15E-07               | -0.0010                   | -0.0052                  | 0.0112                  | 0.0089                   | -0.0061                  | <b><u>-0.0682</u></b>    | <b><u>-0.0632</u></b>    | 0.0046                   |
| P21333     | FLNA      | 2.23E-07               | -0.0033                   | -0.0045                  | 0.0186                  | 0.0050                   | -0.0035                  | <b><u>-0.0712</u></b>    | <b><u>-0.0690</u></b>    | 0.0072                   |
| O00194     | RAB27B    | 2.29E-07               | 0.0067                    | 0.0028                   | 0.0276                  | 0.0141                   | <b><u>-0.0033</u></b>    | <b><u>-0.0962</u></b>    | <b><u>-0.0836</u></b>    | 0.0125                   |
| P06737     | PYGL      | 2.32E-07               | 0.0208                    | -0.0112                  | 0.0128                  | 0.0058                   | -0.0223                  | <b><u>-0.1114</u></b>    | <b><u>-0.1035</u></b>    | 0.0049                   |
| Q04917     | YWHAH     | 2.7E-07                | -0.0076                   | -0.0080                  | 0.0141                  | -0.0021                  | -0.0192                  | <b><u>-0.1089</u></b>    | <b><u>-0.1075</u></b>    | -0.0013                  |
| P11277     | SPTB      | 2.96E-07               | -0.0370                   | -0.0574                  | -0.0342                 | -0.0602                  | -0.0823                  | <b><u>-0.1376</u></b>    | <b><u>-0.1163</u></b>    | <b><u>-0.0787</u></b>    |
| Q15084     | PDIA6     | 2.96E-07               | -0.0057                   | -0.0164                  | 0.0186                  | 0.0112                   | -0.0089                  | <b><u>-0.1103</u></b>    | <b><u>-0.1100</u></b>    | 0.0108                   |
| P16615     | ATP2A2    | 3.06E-07               | -0.0077                   | -0.0082                  | 0.0266                  | 0.0071                   | -0.0066                  | <b><u>-0.1041</u></b>    | <b><u>-0.1064</u></b>    | 0.0113                   |
| P37837     | TALDO1    | 3.27E-07               | 0.0005                    | -0.0216                  | 0.0001                  | -0.0114                  | -0.0299                  | <b><u>-0.0912</u></b>    | <b><u>-0.0805</u></b>    | -0.0125                  |
| Q16181     | SEPTIN7   | 3.46E-07               | -0.0020                   | -0.0077                  | 0.0191                  | 0.0025                   | -0.0102                  | <b><u>-0.0977</u></b>    | <b><u>-0.0953</u></b>    | 0.0067                   |
| O95810     | CAVIN2    | 4.05E-07               | -0.0059                   | -0.0036                  | 0.0205                  | 0.0042                   | -0.0083                  | <b><u>-0.0888</u></b>    | <b><u>-0.0889</u></b>    | 0.0089                   |
| P51572     | BCAP31    | 4.14E-07               | -0.0011                   | -0.0066                  | 0.0302                  | 0.0130                   | -0.0134                  | <b><u>-0.1097</u></b>    | <b><u>-0.1017</u></b>    | 0.0116                   |
| P62873     | GNB1      | 4.14E-07               | 0.0035                    | 0.0014                   | 0.0258                  | 0.0099                   | -0.0050                  | <b><u>-0.0701</u></b>    | <b><u>-0.0785</u></b>    | 0.0120                   |
| P27797     | CALR      | 4.83E-07               | 0.0049                    | 0.0009                   | 0.0203                  | 0.0078                   | -0.0080                  | <b><u>-0.0630</u></b>    | <b><u>-0.0630</u></b>    | 0.0051                   |
| P08514     | ITGA2B    | 4.93E-07               | -0.0056                   | -0.0053                  | 0.0204                  | 0.0062                   | -0.0066                  | <b><u>-0.0822</u></b>    | <b><u>-0.0811</u></b>    | 0.0083                   |
| Q15942     | ZYX       | 5.24E-07               | 0.0126                    | 0.0041                   | 0.0225                  | -0.0051                  | -0.0077                  | <b><u>-0.1065</u></b>    | <b><u>-0.1030</u></b>    | 0.0183                   |
| Q16851     | UGP2      | 5.98E-07               | -0.0148                   | -0.0114                  | 0.0081                  | -0.0107                  | -0.0191                  | <b><u>-0.1138</u></b>    | <b><u>-0.1069</u></b>    | -0.0020                  |
| Q9ULV4     | CORO1C    | 6.87E-07               | -0.0050                   | -0.0037                  | 0.0182                  | 0.0028                   | -0.0108                  | <b><u>-0.0867</u></b>    | <b><u>-0.0874</u></b>    | 0.0092                   |
| P14618     | PKM       | 8.99E-07               | -0.0046                   | -0.0049                  | 0.0171                  | 0.0042                   | -0.0097                  | <b><u>-0.0731</u></b>    | <b><u>-0.0695</u></b>    | 0.0070                   |
| P12814     | ACTN1     | 9.41E-07               | -0.0088                   | -0.0067                  | 0.0162                  | 0.0030                   | -0.0080                  | <b><u>-0.0788</u></b>    | <b><u>-0.0767</u></b>    | 0.0057                   |
| Q15365     | PCBP1     | 9.5E-07                | 0.0094                    | -0.0192                  | 0.0075                  | -0.0007                  | -0.0241                  | <b><u>-0.0731</u></b>    | <b><u>-0.0968</u></b>    | 0.0028                   |
| P27105     | STOM      | 9.61E-07               | -0.0131                   | -0.0100                  | 0.0146                  | -0.0046                  | -0.0147                  | <b><u>-0.0974</u></b>    | <b><u>-0.0925</u></b>    | -0.0016                  |
| P14543     | NID1      | 9.64E-07               | -0.0007                   | -0.0138                  | 0.0090                  | 0.0042                   | <b><u>-0.0021</u></b>    | <b><u>-0.0522</u></b>    | <b><u>-0.0577</u></b>    | 0.0003                   |
| Q9NTJ5     | SACM1L    | 9.94E-07               | -0.0025                   | -0.0109                  | 0.0196                  | -0.0024                  | -0.0124                  | <b><u>-0.0861</u></b>    | <b><u>-0.0927</u></b>    | 0.0042                   |
| P07437     | TUBB      | 1.1E-06                | -0.0065                   | -0.0055                  | 0.0206                  | 0.0027                   | -0.0064                  | <b><u>-0.0807</u></b>    | <b><u>-0.0793</u></b>    | 0.0070                   |
| P45880     | VDAC2     | 1.12E-06               | -0.0169                   | -0.0144                  | 0.0208                  | 0.0039                   | -0.0106                  | <b><u>-0.1427</u></b>    | <b><u>-0.1242</u></b>    | 0.0067                   |

| Protein ID | Gene name | ANOVA Adjusted <i>p</i> -value | Control period            |                          |                         | Experimental period      |                          |                          |                          |                          |
|------------|-----------|--------------------------------|---------------------------|--------------------------|-------------------------|--------------------------|--------------------------|--------------------------|--------------------------|--------------------------|
|            |           |                                | -120 min Log2 Fold change | -60 min Log2 Fold change | 60 min Log2 Fold change | 120 min Log2 Fold change | 180 min Log2 Fold change | 240 min Log2 Fold change | 300 min Log2 Fold change | 360 min Log2 Fold change |
| P61160     | ACTR2     | 1.16E-06                       | -0.0174                   | -0.0113                  | 0.0118                  | -0.0019                  | -0.0134                  | <b><u>-0.1040</u></b>    | <b><u>-0.0989</u></b>    | 0.0036                   |
| P68104     | EEF1A1    | 1.22E-06                       | 0.0091                    | -0.0190                  | 0.0140                  | 0.0025                   | -0.0271                  | <b><u>-0.1072</u></b>    | <b><u>-0.0930</u></b>    | -0.0047                  |
| P78417     | GSTO1     | 1.25E-06                       | 0.0122                    | -0.0151                  | 0.0050                  | -0.0050                  | -0.0263                  | <b><u>-0.0844</u></b>    | <b><u>-0.0636</u></b>    | 0.0041                   |
| P27824     | CANX      | 1.26E-06                       | -0.0089                   | -0.0087                  | 0.0154                  | 0.0028                   | -0.0072                  | <b><u>-0.0896</u></b>    | <b><u>-0.0889</u></b>    | 0.0033                   |
| P68366     | TUBA4A    | 1.3E-06                        | -0.0087                   | -0.0048                  | 0.0191                  | 0.0024                   | -0.0049                  | <b><u>-0.0799</u></b>    | <b><u>-0.0816</u></b>    | 0.0070                   |
| P09493     | TPM1      | 1.68E-06                       | 0.0050                    | -0.0025                  | 0.0248                  | 0.0065                   | -0.0123                  | <b><u>-0.1000</u></b>    | <b><u>-0.0883</u></b>    | 0.0031                   |
| P31146     | CORO1A    | 1.87E-06                       | -0.0049                   | -0.0083                  | 0.0198                  | 0.0019                   | -0.0196                  | <b><u>-0.1020</u></b>    | <b><u>-0.1015</u></b>    | 0.0055                   |
| P68133     | ACTA1     | 2E-06                          | 0.0044                    | -0.0028                  | 0.0249                  | 0.0118                   | -0.0046                  | <b><u>-0.0757</u></b>    | <b><u>-0.0760</u></b>    | 0.0121                   |
| Q9Y277     | VDAC3     | 2.08E-06                       | -0.0097                   | -0.0039                  | 0.0238                  | 0.0086                   | <b><u>-0.0043</u></b>    | <b><u>-0.1084</u></b>    | <b><u>-0.1028</u></b>    | 0.0095                   |
| P63104     | YWHAZ     | 2.39E-06                       | -0.0102                   | -0.0070                  | 0.0193                  | 0.0001                   | -0.0124                  | <b><u>-0.0825</u></b>    | <b><u>-0.0841</u></b>    | 0.0052                   |
| P23229     | ITGA6     | 2.59E-06                       | 0.0029                    | 0.0048                   | 0.0296                  | 0.0146                   | <b><u>-0.0045</u></b>    | <b><u>-0.1001</u></b>    | <b><u>-0.0859</u></b>    | 0.0206                   |
| P35579     | MYH9      | 2.63E-06                       | -0.0107                   | -0.0050                  | 0.0189                  | 0.0037                   | -0.0054                  | <b><u>-0.0750</u></b>    | <b><u>-0.0742</u></b>    | 0.0054                   |
| Q9H4B7     | TUBB1     | 2.68E-06                       | -0.0102                   | -0.0041                  | 0.0213                  | 0.0029                   | -0.0065                  | <b><u>-0.0837</u></b>    | <b><u>-0.0803</u></b>    | 0.0083                   |
| Q9Y696     | CLIC4     | 2.71E-06                       | -0.0001                   | -0.0068                  | 0.0096                  | 0.0078                   | -0.0210                  | <b><u>-0.0821</u></b>    | <b><u>-0.0849</u></b>    | 0.0000                   |
| O75563     | SKAP2     | 2.82E-06                       | -0.0018                   | 0.0122                   | 0.0391                  | 0.0110                   | <b><u>-0.0051</u></b>    | <b><u>-0.1191</u></b>    | <b><u>-0.1043</u></b>    | 0.0178                   |
| P30405     | PPIF      | 2.94E-06                       | -0.0068                   | -0.0192                  | 0.0209                  | -0.0061                  | -0.0148                  | <b><u>-0.1383</u></b>    | <b><u>-0.1093</u></b>    | -0.0076                  |
| Q86UX7     | FERMT3    | 3.79E-06                       | -0.0103                   | -0.0066                  | 0.0140                  | 0.0012                   | -0.0123                  | <b><u>-0.0734</u></b>    | <b><u>-0.0755</u></b>    | 0.0058                   |
| Q9BQE3     | TUBA1C    | 4.19E-06                       | -0.0118                   | -0.0046                  | 0.0214                  | 0.0015                   | -0.0065                  | <b><u>-0.0928</u></b>    | <b><u>-0.0914</u></b>    | 0.0065                   |
| Q01813     | PFKP      | 5.73E-06                       | -0.0059                   | -0.0129                  | 0.0103                  | 0.0039                   | -0.0158                  | <b><u>-0.0781</u></b>    | <b><u>-0.0716</u></b>    | 0.0045                   |
| O75083     | WDR1      | 5.73E-06                       | -0.0121                   | -0.0078                  | 0.0249                  | 0.0036                   | -0.0101                  | <b><u>-0.0815</u></b>    | <b><u>-0.0797</u></b>    | 0.0054                   |
| Q93084     | Q93084    | 5.81E-06                       | -0.0093                   | -0.0082                  | 0.0212                  | 0.0046                   | -0.0072                  | <b><u>-0.0921</u></b>    | <b><u>-0.0911</u></b>    | 0.0055                   |
| P19971     | TYMP      | 5.88E-06                       | 0.0200                    | 0.0085                   | 0.0345                  | 0.0194                   | <b><u>-0.0014</u></b>    | <b><u>-0.0742</u></b>    | <b><u>-0.0749</u></b>    | 0.0232                   |
| Q9HBI1     | PARVB     | 6.76E-06                       | -0.0076                   | -0.0024                  | 0.0246                  | 0.0044                   | -0.0066                  | <b><u>-0.0825</u></b>    | <b><u>-0.0884</u></b>    | 0.0082                   |
| P68371     | TUBB4B    | 6.85E-06                       | -0.0144                   | -0.0065                  | 0.0197                  | -0.0006                  | -0.0063                  | <b><u>-0.0917</u></b>    | <b><u>-0.0805</u></b>    | 0.0074                   |
| Q13642     | FHL1      | 6.86E-06                       | -0.0124                   | -0.0090                  | 0.0176                  | -0.0093                  | -0.0100                  | <b><u>-0.0992</u></b>    | <b><u>-0.0980</u></b>    | 0.0051                   |
| P05106     | ITGB3     | 7.08E-06                       | -0.0113                   | -0.0074                  | 0.0208                  | 0.0027                   | -0.0109                  | <b><u>-0.0811</u></b>    | <b><u>-0.0794</u></b>    | 0.0061                   |

| Protein ID | Gene name | ANOVA Adjusted p-value | Control period            |                          |                         | Experimental period      |                          |                          |                          |                          |
|------------|-----------|------------------------|---------------------------|--------------------------|-------------------------|--------------------------|--------------------------|--------------------------|--------------------------|--------------------------|
|            |           |                        | -120 min Log2 Fold change | -60 min Log2 Fold change | 60 min Log2 Fold change | 120 min Log2 Fold change | 180 min Log2 Fold change | 240 min Log2 Fold change | 300 min Log2 Fold change | 360 min Log2 Fold change |
| O15144     | ARPC2     | 7.08E-06               | -0.0073                   | -0.0063                  | 0.0209                  | 0.0014                   | -0.0154                  | <b><u>-0.0950</u></b>    | <b><u>-0.1004</u></b>    | 0.0050                   |
| Q9Y4L1     | HYOU1     | 7.52E-06               | 0.0086                    | -0.0035                  | 0.0088                  | 0.0069                   | <b><u>-0.0032</u></b>    | <b><u>-0.0447</u></b>    | <b><u>-0.0358</u></b>    | 0.0030                   |
| O43707     | ACTN4     | 8.79E-06               | -0.0119                   | -0.0080                  | 0.0153                  | 0.0074                   | -0.0073                  | <b><u>-0.0979</u></b>    | <b><u>-0.0875</u></b>    | 0.0071                   |
| P04843     | RPN1      | 8.86E-06               | -0.0110                   | -0.0062                  | 0.0255                  | 0.0032                   | <b><u>-0.0034</u></b>    | <b><u>-0.1336</u></b>    | <b><u>-0.1149</u></b>    | 0.0102                   |
| P49411     | TUFM      | 8.86E-06               | -0.0119                   | -0.0171                  | 0.0234                  | -0.0100                  | -0.0086                  | <b><u>-0.1246</u></b>    | <b><u>-0.1035</u></b>    | 0.0069                   |
| P00390     | GSR       | 9.64E-06               | -0.0005                   | -0.0153                  | -0.0039                 | -0.0096                  | -0.0166                  | <b><u>-0.0433</u></b>    | <b><u>-0.0407</u></b>    | -0.0019                  |
| P04040     | CAT       | 1.02E-05               | <b><u>-0.0372</u></b>     | -0.0695                  | -0.0492                 | <b><u>-0.0638</u></b>    | -0.0783                  | <b><u>-0.1023</u></b>    | <b><u>-0.0892</u></b>    | <b><u>-0.0660</u></b>    |
| Q9H4M9     | EHD1      | 1.02E-05               | -0.0155                   | -0.0064                  | 0.0186                  | -0.0115                  | -0.0197                  | <b><u>-0.1002</u></b>    | <b><u>-0.1044</u></b>    | 0.0093                   |
| Q9NZN3     | EHD3      | 1.03E-05               | -0.0173                   | -0.0075                  | 0.0208                  | 0.0011                   | -0.0061                  | <b><u>-0.0973</u></b>    | <b><u>-0.0905</u></b>    | 0.0107                   |
| P14770     | GP9       | 1.14E-05               | -0.0057                   | 0.0026                   | 0.0293                  | 0.0128                   | <b><u>0.0024</u></b>     | <b><u>-0.0838</u></b>    | <b><u>-0.0944</u></b>    | 0.0183                   |
| Q14766     | LTBP1     | 1.19E-05               | -0.0082                   | -0.0158                  | 0.0113                  | 0.0000                   | -0.0502                  | <b><u>-0.1012</u></b>    | <b><u>-0.0932</u></b>    | 0.0014                   |
| P08567     | PLEK      | 1.19E-05               | 0.0162                    | -0.0062                  | 0.0200                  | 0.0059                   | -0.0065                  | <b><u>-0.0874</u></b>    | -0.0574                  | 0.0113                   |
| Q9Y613     | FHOD1     | 1.34E-05               | 0.0060                    | 0.0098                   | 0.0299                  | 0.0177                   | <b><u>0.0046</u></b>     | <b><u>-0.0964</u></b>    | <b><u>-0.0995</u></b>    | 0.0101                   |
| P24557     | TBXAS1    | 1.4E-05                | -0.0135                   | -0.0269                  | -0.0025                 | 0.0069                   | -0.0185                  | <b><u>-0.0965</u></b>    | <b><u>-0.0904</u></b>    | -0.0096                  |
| P61026     | RAB10     | 1.47E-05               | -0.0187                   | -0.0087                  | 0.0178                  | 0.0008                   | -0.0135                  | <b><u>-0.0888</u></b>    | <b><u>-0.0955</u></b>    | 0.0061                   |
| P30048     | PRDX3     | 1.49E-05               | -0.0229                   | -0.0223                  | 0.0178                  | -0.0056                  | <b><u>-0.0011</u></b>    | <b><u>-0.1217</u></b>    | <b><u>-0.1192</u></b>    | 0.0026                   |
| Q13418     | ILK       | 1.49E-05               | -0.0138                   | -0.0047                  | 0.0220                  | 0.0029                   | -0.0084                  | <b><u>-0.0864</u></b>    | <b><u>-0.0835</u></b>    | 0.0075                   |
| P11216     | PYGB      | 1.63E-05               | 0.0036                    | -0.0044                  | 0.0203                  | 0.0022                   | -0.0174                  | <b><u>-0.0854</u></b>    | <b><u>-0.0917</u></b>    | 0.0051                   |
| P00918     | CA2       | 1.91E-05               | <b><u>-0.0368</u></b>     | -0.0710                  | -0.0421                 | -0.0602                  | -0.0828                  | <b><u>-0.1207</u></b>    | <b><u>-0.0990</u></b>    | -0.0628                  |
| O75390     | CS        | 2.02E-05               | -0.0141                   | -0.0115                  | 0.0225                  | 0.0042                   | <b><u>-0.0041</u></b>    | <b><u>-0.1060</u></b>    | <b><u>-0.1031</u></b>    | 0.0052                   |
| Q96FW1     | OTUB1     | 2.22E-05               | -0.0348                   | -0.0257                  | 0.0232                  | 0.0060                   | -0.0287                  | <b><u>-0.1573</u></b>    | -0.0768                  | -0.0008                  |
| P04792     | HSPB1     | 2.77E-05               | 0.0161                    | -0.0024                  | 0.0224                  | -0.0016                  | <b><u>-0.0025</u></b>    | <b><u>-0.0732</u></b>    | <b><u>-0.0745</u></b>    | 0.0184                   |
| Q9NQC3     | RTN4      | 3.11E-05               | -0.0205                   | -0.0015                  | 0.0236                  | 0.0059                   | <b><u>-0.0027</u></b>    | <b><u>-0.1051</u></b>    | <b><u>-0.1088</u></b>    | 0.0115                   |
| P13224     | GP1BB     | 3.32E-05               | -0.0137                   | 0.0031                   | 0.0297                  | 0.0086                   | <b><u>0.0030</u></b>     | -0.0881                  | <b><u>-0.0986</u></b>    | 0.0162                   |
| Q14141     | SEPTIN6   | 3.37E-05               | -0.0120                   | -0.0064                  | 0.0269                  | -0.0016                  | -0.0067                  | <b><u>-0.1002</u></b>    | <b><u>-0.0924</u></b>    | 0.0119                   |
| O75915     | ARL6IP5   | 6.09E-05               | -0.0105                   | -0.0010                  | 0.0233                  | 0.0047                   | <b><u>0.0010</u></b>     | <b><u>-0.1037</u></b>    | -0.0781                  | 0.0133                   |

| Protein ID | Gene name | ANOVA Adjusted <i>p</i> -value | Control period            |                          |                         | Experimental period      |                          |                          |                          |                          |
|------------|-----------|--------------------------------|---------------------------|--------------------------|-------------------------|--------------------------|--------------------------|--------------------------|--------------------------|--------------------------|
|            |           |                                | -120 min Log2 Fold change | -60 min Log2 Fold change | 60 min Log2 Fold change | 120 min Log2 Fold change | 180 min Log2 Fold change | 240 min Log2 Fold change | 300 min Log2 Fold change | 360 min Log2 Fold change |
| Q9NR31     | SAR1A     | 9.19E-05                       | -0.0068                   | -0.0020                  | 0.0194                  | 0.0037                   | -0.0183                  | -0.0727                  | <b><u>-0.0884</u></b>    | 0.0107                   |
| P62826     | RAN       | 0.000121                       | -0.0410                   | -0.0603                  | -0.0278                 | -0.0366                  | -0.0779                  | <b><u>-0.1164</u></b>    | <b><u>-0.1025</u></b>    | -0.0495                  |
| O95866     | MPIG6B    | 0.00019                        | -0.0144                   | -0.0072                  | 0.0280                  | 0.0086                   | -0.0156                  | <b><u>-0.1057</u></b>    | <b><u>-0.1064</u></b>    | 0.0174                   |
| P16671     | CD36      | 0.001115                       | 0.0042                    | -0.0010                  | 0.0210                  | 0.0120                   | -0.0108                  | -0.0887                  | -0.0815                  | 0.0075                   |
| P00488     | F13A1     | 0.002672                       | -0.0033                   | -0.0067                  | 0.0025                  | -0.0038                  | -0.0076                  | <b><u>-0.0289</u></b>    | <b><u>-0.0292</u></b>    | -0.0005                  |
| P00746     | CFD       | 0.003452                       | 0.0137                    | 0.0172                   | -0.0089                 | -0.0111                  | -0.0088                  | -0.0027                  | -0.0043                  | -0.0101                  |
| P36871     | PGM1      | 0.006808                       | -0.0043                   | -0.0008                  | 0.0018                  | 0.0141                   | -0.0098                  | -0.0648                  | -0.0611                  | 0.0101                   |
| P02730     | SLC4A1    | 0.007954                       | -0.0345                   | -0.0650                  | -0.0469                 | -0.0852                  | -0.1082                  | <b><u>-0.1154</u></b>    | -0.0944                  | <b><u>-0.1107</u></b>    |
| P32119     | PRDX2     | 0.025894                       | -0.0513                   | -0.0876                  | -0.0672                 | <b><u>-0.1105</u></b>    | -0.1169                  | <b><u>-0.1102</u></b>    | -0.0935                  | -0.0937                  |
| P02042     | HBD       | 0.042473                       | -0.0409                   | -0.0872                  | -0.0642                 | <b><u>-0.1038</u></b>    | -0.1147                  | -0.1030                  | -0.0849                  | -0.0890                  |
| P68871     | HBB       | 0.047211                       | -0.0447                   | -0.0755                  | -0.0544                 | <b><u>-0.0912</u></b>    | -0.1024                  | -0.0846                  | -0.0763                  | -0.0811                  |
| P24592     | IGFBP6    | 0.047627                       | 0.0268                    | 0.0279                   | -0.0020                 | -0.0028                  | -0.0117                  | 0.0053                   | -0.0004                  | -0.0064                  |

75

76 A one-way ANOVA was performed with FDR adjustment for multiple comparisons, and for significant results, a Tukey post-hoc test was  
77 performed for comparisons of each time point with 0-min. Statistical analyses were performed using R statistical analysis software version 4.2.2.  
78 All proteins that showed a significant change (ANOVA Adjusted  $p < 0.05$ ) are included. Fold changes that are bold and underlined were  
79 significantly different to fasting time 0-min.

80 **Supplementary Table 9.** Pearson correlations between serum MPO protein and metabolic  
 81 biomarkers.

|                          | <b>r</b>                  | <b>p-value</b> | <b>r</b>          | <b>p-value</b> | <b>r</b>           | <b>p-value</b> | <b>r</b>              | <b>p-value</b> |
|--------------------------|---------------------------|----------------|-------------------|----------------|--------------------|----------------|-----------------------|----------------|
|                          | <b>TGs fasting (0 h)</b>  |                | <b>TGs p-AUC</b>  |                | <b>TGs p-iAUC</b>  |                | <b>TGs magnitude</b>  |                |
| <b>MPO fasting (0 h)</b> | 0.157                     | 0.626          | 0.118             | 0.715          | 0.019              | 0.954          | -0.190                | 0.555          |
| <b>MPO p-AUC</b>         | 0.110                     | 0.733          | 0.048             | 0.882          | -0.103             | 0.749          | -0.490                | 0.106          |
| <b>MPO p-iAUC</b>        | -0.032                    | 0.920          | -0.068            | 0.834          | -0.148             | 0.646          | -0.355                | 0.258          |
| <b>MPO magnitude</b>     | 0.075                     | 0.816          | 0.046             | 0.886          | -0.036             | 0.912          | -0.262                | 0.411          |
|                          | <b>Gluc fasting (0 h)</b> |                | <b>Gluc p-AUC</b> |                | <b>Gluc p-iAUC</b> |                | <b>Gluc magnitude</b> |                |
| <b>MPO fasting (0 h)</b> | 0.219                     | 0.493          | 0.154             | 0.633          | -0.061             | 0.851          | -0.142                | 0.660          |
| <b>MPO p-AUC</b>         | 0.423                     | 0.171          | 0.058             | 0.857          | -0.443             | 0.150          | -0.249                | 0.436          |
| <b>MPO p-iAUC</b>        | 0.244                     | 0.445          | -0.022            | 0.945          | -0.332             | 0.291          | -0.045                | 0.889          |
| <b>MPO magnitude</b>     | 0.216                     | 0.500          | -0.001            | 0.997          | -0.337             | 0.284          | -0.086                | 0.791          |

82

83 Gluc, Glucose; MPO, myeloperoxidase; p-AUC, postprandial area under the curve; p-iAAC,  
 84 postprandial incremental area above the curve; p-iAUC, postprandial incremental area under  
 85 the curve; r, correlation coefficient; TGs, triglycerides; Data are reported from Pearson  
 86 correlation analysis; \* indicates significant correlation  $p < 0.05$ .

87 **Supplementary Table 10. Pearson correlations between plasma SOD1 protein and**  
88 **metabolic biomarkers**

|                           | <b>r</b>                  | <b>p-value</b> | <b>r</b>          | <b>p-value</b> | <b>r</b>           | <b>p-value</b> | <b>r</b>              | <b>p-value</b> |
|---------------------------|---------------------------|----------------|-------------------|----------------|--------------------|----------------|-----------------------|----------------|
|                           | <b>TGs fasting (0 h)</b>  |                | <b>TGs p-AUC</b>  |                | <b>TGs p-iAUC</b>  |                | <b>TGs magnitude</b>  |                |
| <b>SOD1 fasting (0 h)</b> | -0.129                    | 0.691          | -0.029            | 0.929          | 0.212              | 0.509          | -0.063                | 0.845          |
| <b>SOD1 p-AUC</b>         | 0.218                     | 0.496          | 0.228             | 0.475          | 0.214              | 0.503          | -0.018                | 0.957          |
| <b>SOD1 p-iAAC</b>        | -0.293                    | 0.355          | -0.183            | 0.569          | 0.109              | 0.736          | -0.069                | 0.831          |
| <b>SOD1 magnitude</b>     | -0.334                    | 0.289          | -0.231            | 0.470          | 0.044              | 0.893          | -0.188                | 0.558          |
|                           | <b>Gluc fasting (0 h)</b> |                | <b>Gluc p-AUC</b> |                | <b>Gluc p-iAUC</b> |                | <b>Gluc magnitude</b> |                |
| <b>SOD1 fasting (0 h)</b> | <b>-0.630</b>             | <b>0.028*</b>  | <b>-0.774</b>     | <b>0.003*</b>  | -0.560             | 0.059          | -0.055                | 0.864          |
| <b>SOD1 p-AUC</b>         | -0.209                    | 0.513          | -0.280            | 0.378          | -0.314             | 0.320          | -0.089                | 0.783          |
| <b>SOD1 p-iAAC</b>        | <b>-0.600</b>             | <b>0.039*</b>  | <b>-0.723</b>     | <b>0.008*</b>  | -0.446             | 0.146          | 0.008                 | 0.979          |
| <b>SOD1 magnitude</b>     | <b>-0.584</b>             | <b>0.046*</b>  | <b>-0.767</b>     | <b>0.004*</b>  | -0.563             | 0.057          | -0.066                | 0.838          |

89 Gluc, Glucose; MPO, myeloperoxidase; p-AUC, postprandial area under the curve; p-iAAC,  
90 postprandial incremental area above the curve; p-iAUC, postprandial incremental area under  
91 the curve; r, correlation coefficient; SOD1, superoxide dismutase 1; TGs, triglycerides; Data  
92 are reported from Pearson correlation analysis; \* indicates significant correlation  $p < 0.05$ .

93 **Supplementary Table 11. White blood cell counts taken from finger prick blood samples**  
 94 **after a high fat/high carbohydrate meal.**

|                           | <b>Total WBCs</b><br><b>(10<sup>9</sup>/L)</b> | <b>NEU</b><br><b>(10<sup>9</sup>/L)</b> | <b>LYM</b><br><b>(10<sup>9</sup>/L)</b> | <b>MON</b><br><b>(10<sup>9</sup>/L)</b> | <b>EOS</b><br><b>(10<sup>9</sup>/L)</b> |
|---------------------------|------------------------------------------------|-----------------------------------------|-----------------------------------------|-----------------------------------------|-----------------------------------------|
| Fasting<br>(-60 min)      | 5.58 (1.46)                                    | 2.98 (1.12)                             | 2.27 (0.48)                             | 0.25 (0.07)                             | 0.10 (0.04)                             |
| Postprandial<br>(60 min)  | 5.49 (1.28)                                    | 2.27 (0.48)                             | 2.02 (0.40)                             | 0.25 (0.07)                             | 0.08 (0.05)                             |
| Postprandial<br>(120 min) | 5.24 (1.57)                                    | 2.98 (1.16)                             | 1.95 (0.48)                             | 0.25 (0.08)                             | 0.07 (0.07)                             |
| <b>p-values</b>           | 0.214                                          | 0.361                                   | 0.026*                                  | 0.781                                   | 0.034*                                  |

95 EOS, eosinophils; LYM, lymphocytes; MON, monocytes; NEU, neutrophils; WBC, white  
 96 blood cells. Data presented as mean (SD). Repeated measures ANOVA with time as the within-  
 97 subjects factor. \* Indicates significant effect of time  $p < 0.05$ .

98 **Supplementary Table 12.** Proteins that changed in PBMCs after the HFHCM

| Protein ID | Gene name | ANOVA                    |                          | ANOVA                    |                          | Adjusted <i>p</i> -value |
|------------|-----------|--------------------------|--------------------------|--------------------------|--------------------------|--------------------------|
|            |           | Adjusted <i>p</i> -value | 180 min Log2 Fold change | Adjusted <i>p</i> -value | 360 min Log2 Fold change |                          |
| O95881     | TXNDC12   | 0.02503                  | -0.00425                 | 0.02679                  | -0.00806                 | 0.00006                  |
| P13804     | ETFA      | 0.03615                  | 0.00098                  | 0.95078                  | 0.01432                  | 0.00052                  |
| Q9UKZ1     | CNOT11    | 0.04959                  | -0.02023                 | 0.00133                  | -0.01957                 | 0.00147                  |
| O43169     | CYB5B     | 0.04699                  | 0.01237                  | 0.35668                  | 0.04019                  | 0.00034                  |
| Q9BTZ2     | DHRS4     | 0.02503                  | 0.00748                  | 0.27948                  | 0.02456                  | 0.00008                  |
| Q13144     | EIF2B5    | 0.02503                  | -0.00279                 | 0.62268                  | 0.01247                  | 0.00087                  |
| P09429     | HMGB1     | 0.02827                  | 0.00889                  | 0.63960                  | 0.04658                  | 0.00019                  |
| O00487     | PSMD14    | 0.02932                  | 0.00223                  | 0.78978                  | 0.01579                  | 0.00028                  |
| Q9NX62     | IMPAD1    | 0.01692                  | 0.01425                  | 0.02560                  | 0.02895                  | 0.00002                  |
| P78356     | PIP4K2B   | 0.03450                  | -0.00492                 | 0.53319                  | -0.02163                 | 0.00024                  |
| P49795     | RGS19     | 0.03628                  | -0.00348                 | 0.32510                  | -0.01132                 | 0.00023                  |
| Q5VTU8     | ATP5EP2   | 0.04548                  | 0.01830                  | 0.16488                  | 0.04507                  | 0.00026                  |
| Q86SZ2     | TRAPPC6B  | 0.02756                  | 0.01113                  | 0.16513                  | 0.03006                  | 0.00009                  |
| P06753     | TPM3      | 0.01921                  | 0.00384                  | 0.81997                  | 0.03271                  | 0.00008                  |
| Q9Y3C8     | UFC1      | 0.02503                  | 0.01683                  | 0.00693                  | 0.02597                  | 0.00006                  |
| O15258     | RER1      | 0.02827                  | 0.00487                  | 0.24156                  | 0.01465                  | 0.00012                  |
| Q9UEE9     | CFDP1     | 0.02827                  | 0.03470                  | 0.16465                  | 0.09115                  | 0.00011                  |
| Q9UQ13     | SHOC2     | 0.00172                  | 0.02531                  | 0.00305                  | 0.04856                  | 0.00000                  |
| Q6Y7W6     | GIGYF2    | 0.01138                  | 0.04821                  | 0.00944                  | 0.08815                  | 0.00001                  |
| Q13907     | IDI1      | 0.00172                  | 0.02572                  | 0.00011                  | 0.03482                  | 0.00000                  |
| Q86WR0     | CCDC25    | 0.01193                  | -0.00849                 | 0.02658                  | -0.01814                 | 0.00001                  |
| Q9H446     | RWDD1     | 0.00914                  | 0.00387                  | 0.90566                  | 0.05161                  | 0.00002                  |
| Q9UJC5     | SH3BGR2   | 0.02932                  | 0.02405                  | 0.00667                  | 0.03437                  | 0.00015                  |
| P16083     | NQO2      | 0.03628                  | 0.02382                  | 0.00035                  | 0.00421                  | 0.68116                  |
| Q9Y6X5     | ENPP4     | 0.02827                  | -0.00076                 | 0.98242                  | 0.01857                  | 0.00056                  |
| Q14653     | IRF3      | 0.02503                  | 0.02126                  | 0.00069                  | -0.00349                 | 0.74626                  |
| P11169     | SLC2A3    | 0.00082                  | 0.03712                  | 0.00035                  | 0.06398                  | 0.00000                  |
| Q8WZA0     | LZIC      | 0.03999                  | 0.01205                  | 0.25487                  | 0.03480                  | 0.00024                  |
| P13746     | HLA-A     | 0.02368                  | 0.00687                  | 0.00118                  | -0.00201                 | 0.43891                  |
| P26038     | MSN       | 0.01138                  | 0.00351                  | 0.36982                  | 0.01489                  | 0.00002                  |
| P09001     | MRPL3     | 0.02932                  | -0.00054                 | 0.99527                  | 0.02536                  | 0.00062                  |
| Q9NVJ2     | ARL8B     | 0.04881                  | -0.00553                 | 0.00218                  | -0.00596                 | 0.00085                  |
| Q9UNS2     | COPS3     | 0.02746                  | -0.00578                 | 0.00203                  | -0.00732                 | 0.00013                  |
| Q99538     | LGMN      | 0.04881                  | 0.01321                  | 0.04617                  | 0.02399                  | 0.00029                  |
| Q8N335     | GPD1L     | 0.03615                  | 0.00213                  | 0.80756                  | 0.01541                  | 0.00039                  |
| Q96QG7     | MTMR9     | 0.04106                  | -0.02378                 | 0.63548                  | -0.12194                 | 0.00039                  |
| O43427     | FIBP      | 0.02756                  | -0.00788                 | 0.00119                  | -0.00911                 | 0.00020                  |
| P62136     | PPP1CA    | 0.01699                  | 0.00919                  | 0.17578                  | 0.02773                  | 0.00003                  |

99

100 A one-way ANOVA was performed with FDR adjustment for multiple comparisons, and for  
101 significant results, a Tukey post-hoc test was performed for comparisons of each time point  
102 with 0-min. Statistical analyses were performed using R statistical analysis software version  
103 4.2.2.

104
